# Supplementary material for: Combined NMR Spectroscopy and Quantum-Chemical Calculations in Fluorescent 1,2,3-Triazole-4-carboxylic Acids Fine Structures Analysis
Source: MDPI journal article supplement (doi:10.3390/ijms24108947), 2023-05-18
Supplement: s1 [file s1]

# Combined NMR spectroscopy and quantum-chemical calculations in Fluorescent 1,2,3-triazole-4-carboxylic acids fine structures analysis

Nikita E. Safronov<sup>a</sup>, Irena P. Kostova<sup>b</sup>, M. Alcolea Palafox<sup>c\*\*</sup>, Nataliya P. Belskaya<sup>a\*</sup>

<sup>a</sup>Ural Federal University, 19 Mira Str., Yekaterinburg 620002, Russian Federation

<sup>b</sup>Department of Chemistry, Faculty of Pharmacy, Medical University – Sofia, 2 Dunav Str., Sofia, Bulgaria

<sup>c</sup>Departamento de Química Física, Facultad de Ciencias Químicas, Universidad Complutense, Madrid  
28040, Spain

Corresponding authors Email address: [n.p.belskaya@urfu.ru](mailto:n.p.belskaya@urfu.ru) (Nataliya P. Belskaya)

## Table of contents

|                                                                              |     |
|------------------------------------------------------------------------------|-----|
| 1. Experimental section .....                                                | S2  |
| 2. NMR spectra of new compounds .....                                        | S5  |
| 3. The experimental determination of the pKa values of acids 1a and 1b ..... | S9  |
| 4. Photophysical investigation .....                                         | S11 |
| 5. NMR spectra of acids 1a and 1b compounds in different solvents .....      | S15 |
| 6. Reference .....                                                           | S25 |



## 1. Experimental Section

### *Instruments and Materials*

$^1\text{H}$  NMR and  $^{13}\text{C}$  NMR, spectra were recorded with a Bruker Avance II (Karlsruhe, Germany) (400 MHz for  $^1\text{H}$ , 100 MHz for  $^{13}\text{C}$ ) spectrometer. Chemical shifts are reported in parts per million (ppm) relative to TMS in  $^1\text{H}$  NMR, to the residual solvent signals in  $^{13}\text{C}$  as external reference. Coupling constants ( $J$ ) values are given in Hertz (Hz). Signal splitting patterns are described as a singlet (s), doublet (d), triplet (t), quartet (q), sextet (sext), quintet (quin), multiplet (m), broad (br), doublet of doublets (dd), doublet of triplets (dt) or AA'XX' - spin system of para-substituted benzene with two different substituents. Mass spectra were recorded with a Shimadzu GCMS-QP 2010 "Ultra" (Kyoto, Japan) mass spectrometer using the electron impact (EI) ionization technique (40-200 °C, 70 eV). The abbreviation  $[\text{M}]^+$  refers to the molecular ion. Spectra of exact mass were acquiring on a quadrupole orthogonal acceleration time-of-flight mass spectrometer (Synapt G2 HDMS, Waters, Milford, MA). Samples were infused at 3  $\mu\text{L}/\text{min}$  and spectra were obtained in positive (or: negative) ionization mode with a resolution of 15000 (FWHM) using leucine enkephalin as lock mass. The Fourier-transform infrared (FT-IR) spectra were obtained using a Bruker Alpha (NPVO, ZnSe) spectrometer (Ettlingen, Germany). Melting points were determined on a Stuart SMP3 apparatus (Staffordshire, ST15 OSA, UK).

UV-Vis absorption spectra were recorded on a Shimadzu UV-1800 spectrometer. The fluorescence of the sample solution was measured using a Hitachi F-7000 spectrophotometer (Tokyo, Japan). The absorption and emission spectra were recorded in DMSO, 1,4-dioxane, MeOH using 10.00 mm quartz cells. The excitation wavelength was at the absorption maxima. Atmospheric oxygen contained in solutions was not removed. Concentration of the compounds in the solution was  $5.0 \times 10^{-5}$  M and  $5.0 \times 10^{-6}$  M for absorption and fluorescence measurements, respectively. The relative fluorescence quantum yields ( $QY$ ) were determined using quinine sulfate in 0.1 M  $\text{H}_2\text{SO}_4$  as a standard ( $\Phi_F = 0.546$ ). Time-resolution study were recorded on Horiba FluoroMax 4 Spectrofluorometer (Kyoto, Japan) with Quanta- $\phi$  integrating sphere using FluorEssence 3.5 Software.

The reactions were monitored by analytical thin-layer chromatography (TLC) on aluminium-backed silica-gel plates (Sorbfil UV-254). Visualization of components was accomplished by short wavelength UV light (254 nm). Solvents were dried and distilled according to the common procedures. All solvents were of spectroscopic grade.

1-aryl-4-cyano-1,2,3-triazoles **3a-r** were prepared according to procedures reported in the literature and their spectral characteristics were identical to the published data [1,2].



## Preparation and characterization of new compounds

### General synthetic procedure for synthesis acids 1

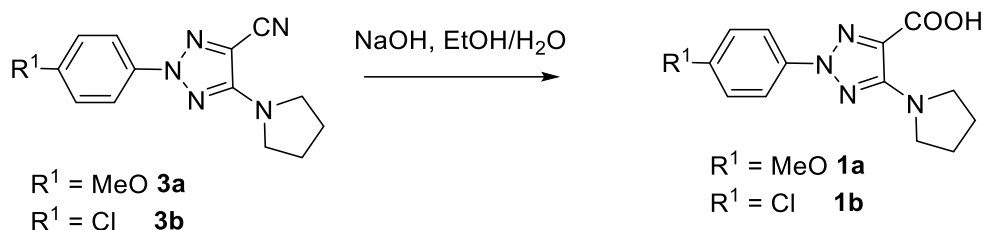

Triazole **3a, b** (1.0 mmol) was added to a 40% NaOH solution in ethanol/H<sub>2</sub>O. The mixture was heated under reflux until TLC indicated total conversion of starting triazole. Then solution was cooled to room temperature and poured into a mixture of water and crushed ice. The resulting mixture was acidified with conc. HCl to pH 1 and formed precipitate was filtered off and crystallized from ethanol.

### General synthetic procedure for synthesis salts 2

Aqueous sodium hydroxide solution (1.0 mmol, 2 mL) was added dropwise to a solution of 5-amino-2-aryl-1,2,3-triazol-4-carboxylic acid (1.0 mmol) in ethanol (10 mL) at 60 °C. The mixture was stirred at 60 °C for a further 30 - 40 min. Volatile solvents were removed in vacuo to dryness to provide sodium 5-amino-2-aryl-1,2,3-triazol-4-carboxylate as a solid.

#### 2-(4-Methoxyphenyl)-5-(pyrrolidin-1-yl)-2H-1,2,3-triazole-4-carboxylic acid (**1a**). Colorless powder,

yield 93%, mp 184-185 °C. <sup>1</sup>H NMR (DMSO-*d*<sub>6</sub>, 400 MHz): δ 1.88 (m, 4H, CH<sub>2</sub>), 3.44 (t, 4H, *J* = 6.3 Hz, CH<sub>2</sub>), 3.81 (s, 3H, OMe), 7.08 and 7.84 (AA'XX', 4H, *J* = 8.9 Hz, H<sub>Ar</sub>), 12.89 (s, 1H, COOH). <sup>13</sup>C NMR (DMSO-*d*<sub>6</sub>, 100 MHz.): 24.9 (2C), 49.8 (2C), 55.5, 114.6 (2C), 119.6 (2C), 125.6, 132.5, 154.8, 158.5, 162.2. HRMS (ESI+), *m/z* calcd. for C<sub>14</sub>H<sub>16</sub>N<sub>4</sub>O<sub>3</sub> [M+H]<sup>+</sup> 289.1295, found 289.1299.

#### 2-(4-Chlorophenyl)-5-(pyrrolidin-1-yl)-2H-1,2,3-triazole-4-carboxylic acid (**1b**). Colourless powder,

yield 89%, mp 132-133 °C. <sup>1</sup>H NMR (DMSO-*d*<sub>6</sub>, 400 MHz): δ 1.89 (m, 4H, CH<sub>2</sub>), 3.44 (m, 4H, CH<sub>2</sub>), 7.58 and 7.92 (AA'XX', 4H, *J* = 8.8 Hz, H<sub>Ar</sub>), 13.07 (s, 1H, COOH). <sup>13</sup>C NMR (DMSO-*d*<sub>6</sub>, 100 MHz.): 24.9 (2C), 49.8 (2C), 119.5 (2C), 126.8, 129.5 (2C), 131.5, 137.5, 154.8, 162.0. HRMS (ESI+), *m/z* calcd. for C<sub>13</sub>H<sub>13</sub>ClN<sub>4</sub>O<sub>2</sub> [M+H]<sup>+</sup> 293.0800, found 293.0809.

#### sodium 2-(4-methoxyphenyl)-5-(pyrrolidin-1-yl)-2H-1,2,3-triazole-4-carboxylate (**2a**).

Colourless powder, yield 80%, mp > 350 °C. <sup>1</sup>H NMR (D<sub>2</sub>O, 400 MHz): δ 1.95 (s, 4H, CH<sub>2</sub>), 3.38 (s, 4H, CH<sub>2</sub>), 3.85 (s, 3H, CH<sub>3</sub>), 7.05 (d, 2H, *J* = 8.4 Hz, H<sub>Ar</sub>), 7.40 (d, 2H, *J* = 8.4 Hz, H<sub>Ar</sub>). <sup>13</sup>C NMR (D<sub>2</sub>O, 100 MHz.): 24.8, 50.4 (2C), 55.6 (2C), 114.6 (2C), 120.5 (2C), 132.4, 133.0, 154.1, 158.0, 168.7. HRMS (ESI+), *m/z* calcd. for C<sub>14</sub>H<sub>15</sub>N<sub>4</sub>NaO<sub>3</sub> [M+H]<sup>+</sup> 289.1295, found 289.1306.

#### Sodium 2-(4-chlorophenyl)-5-(pyrrolidin-1-yl)-2H-1,2,3-triazole-4-carboxylate (**2b**).

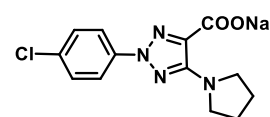



Colourless powder, yield 75%, mp > 350 °C.  $^1\text{H}$  NMR ( $\text{D}_2\text{O}$ , 400 MHz):  $\delta$  1.95 (s, 4H,  $\text{CH}_2$ ), 3.38 (s, 4H,  $\text{CH}_2$ ), 3.85 (s, 3H,  $\text{CH}_3$ ), 7.41 (d, 2H,  $J = 7.4$  Hz,  $\text{H}_{\text{Ar}}$ ), 7.69 (d, 2H,  $J = 7.4$  Hz,  $\text{H}_{\text{Ar}}$ ).  $^{13}\text{C}$  NMR ( $\text{D}_2\text{O}$ , 100 MHz): 24.9 (2C), 50.3 (2C), 119.7 (2C), 128.9 (2C), 131.8, 133.6, 137.4, 154.3, 168.6. HRMS (ESI+),  $m/z$  calcd. for  $\text{C}_{13}\text{H}_{12}\text{ClN}_4\text{NaO}_2$   $[\text{M}+\text{H}]^+$  293.0800, found 293.0807.



## 2. NMR spectra of new compounds

1a

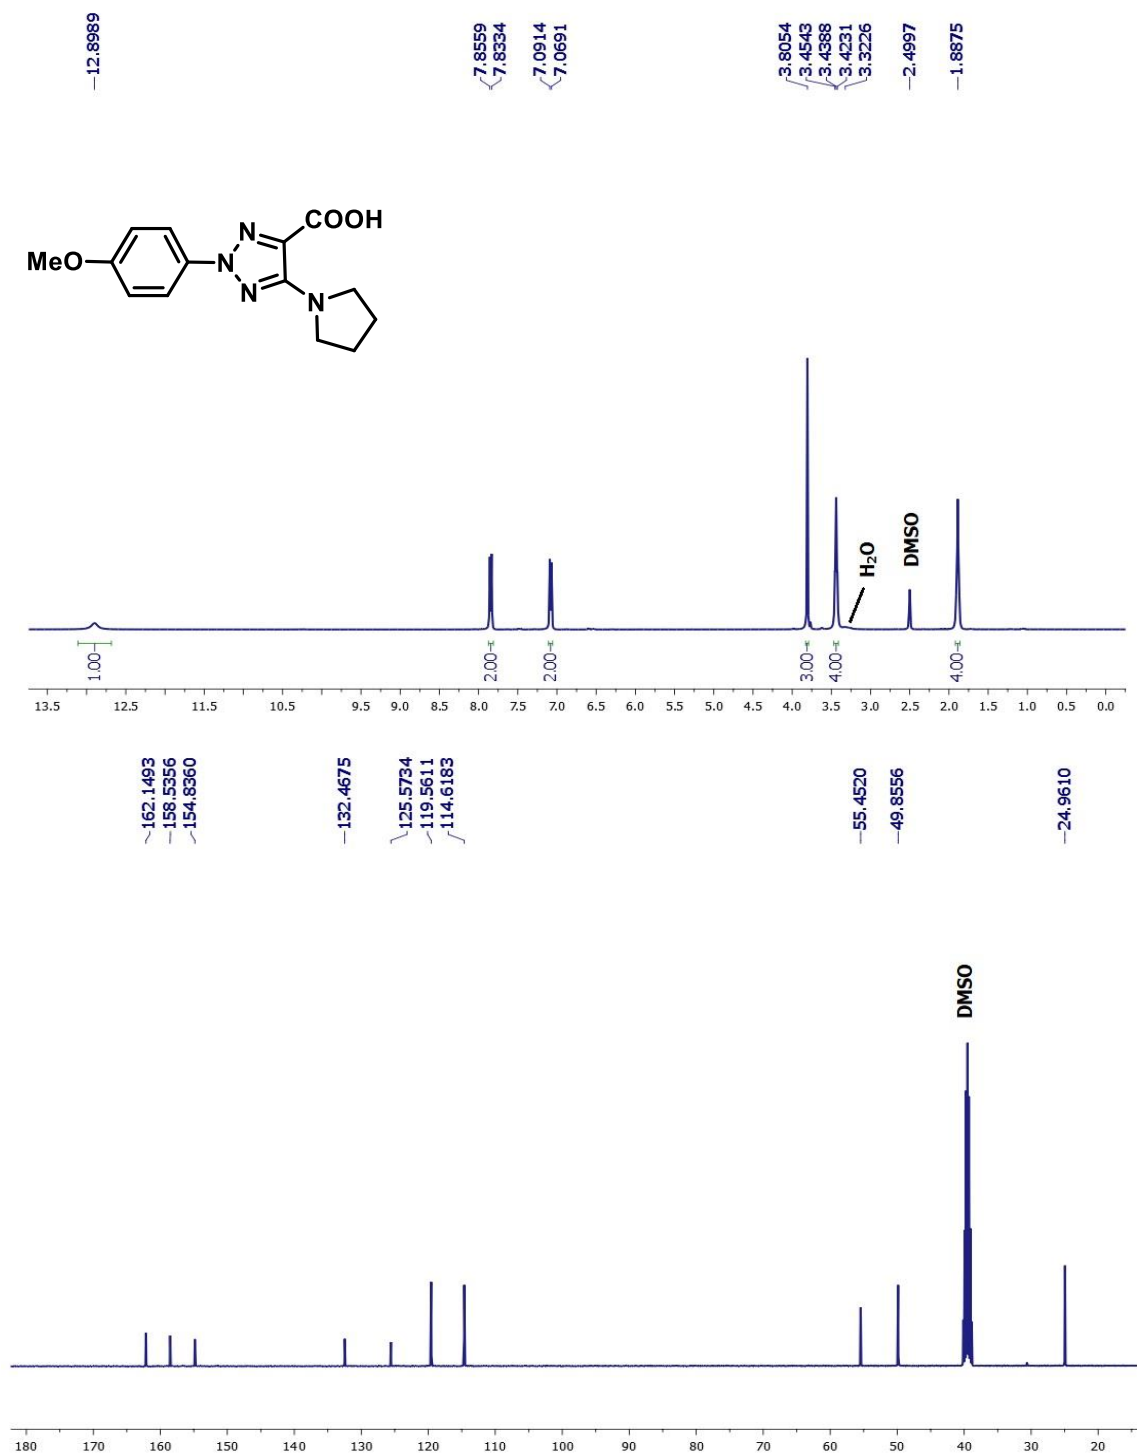

**Fig. S1.** <sup>1</sup>H NMR (400 MHz, DMSO-*d*<sub>6</sub>) and <sup>13</sup>C NMR (100 MHz, DMSO-*d*<sub>6</sub>) spectra of 2-(4-methoxyphenyl)-5-(pyrrolidin-1-yl)-2H-1,2,3-triazole-4-carboxylic acid (**1a**)



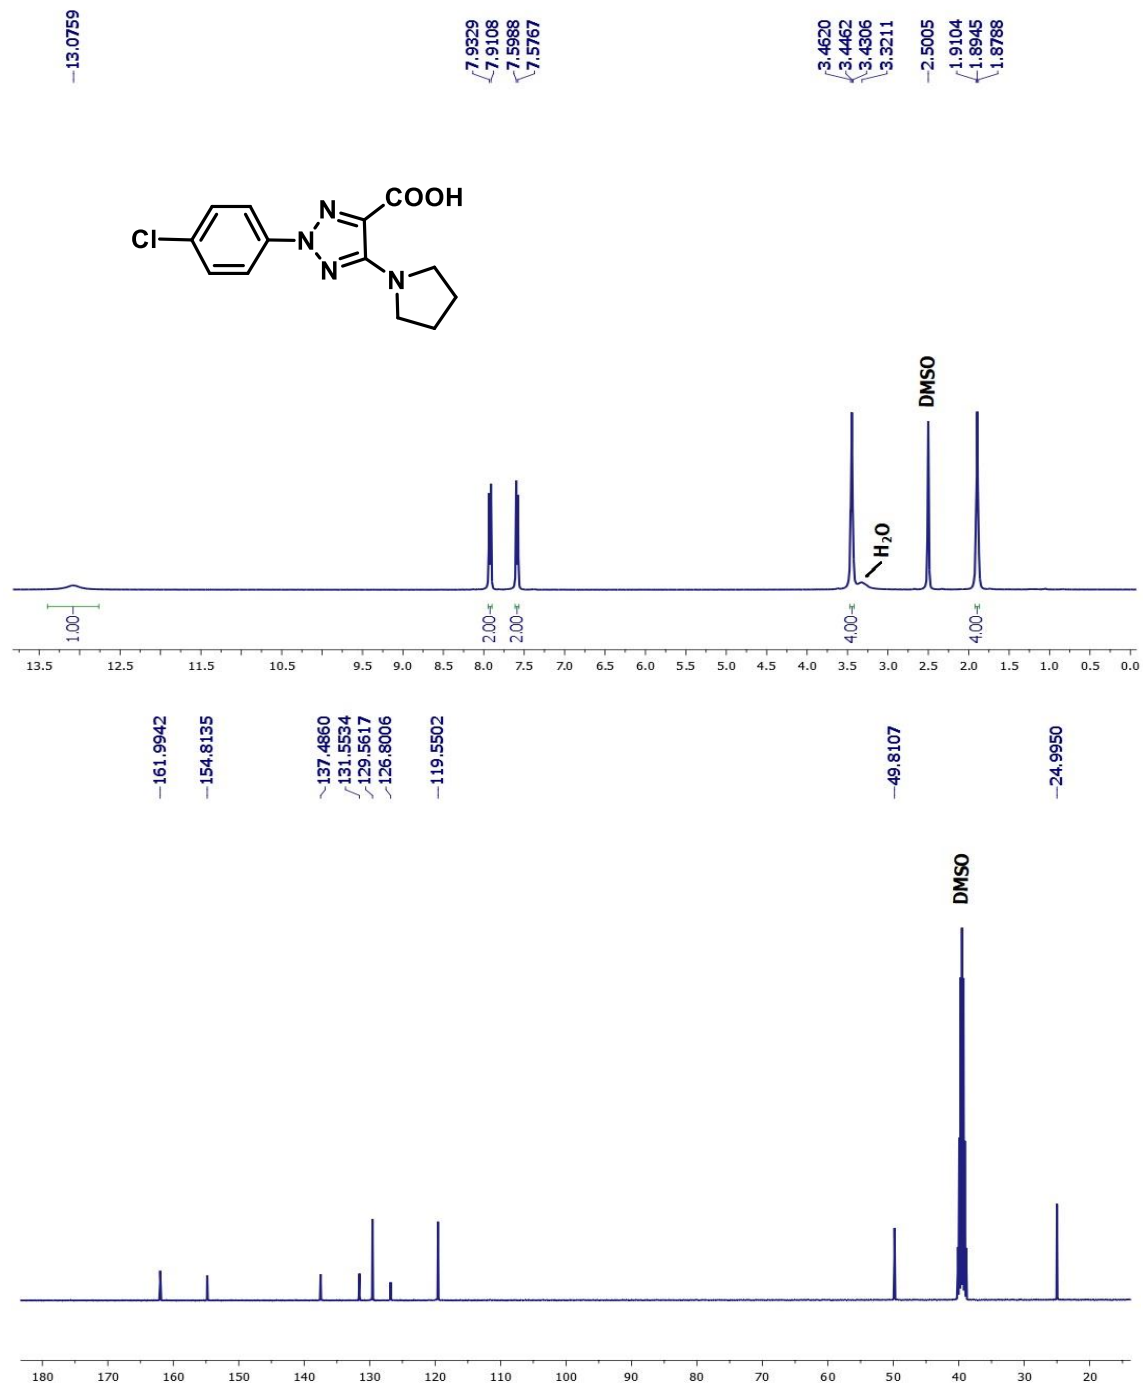

**Fig. S2.** <sup>1</sup>H NMR (400 MHz, DMSO-*d*<sub>6</sub>) and <sup>13</sup>C NMR (100 MHz, DMSO-*d*<sub>6</sub>) spectra of 2-(4-chlorophenyl)-5-(pyrrolidin-1-yl)-2H-1,2,3-triazole-4-carboxylic acid (**1b**)



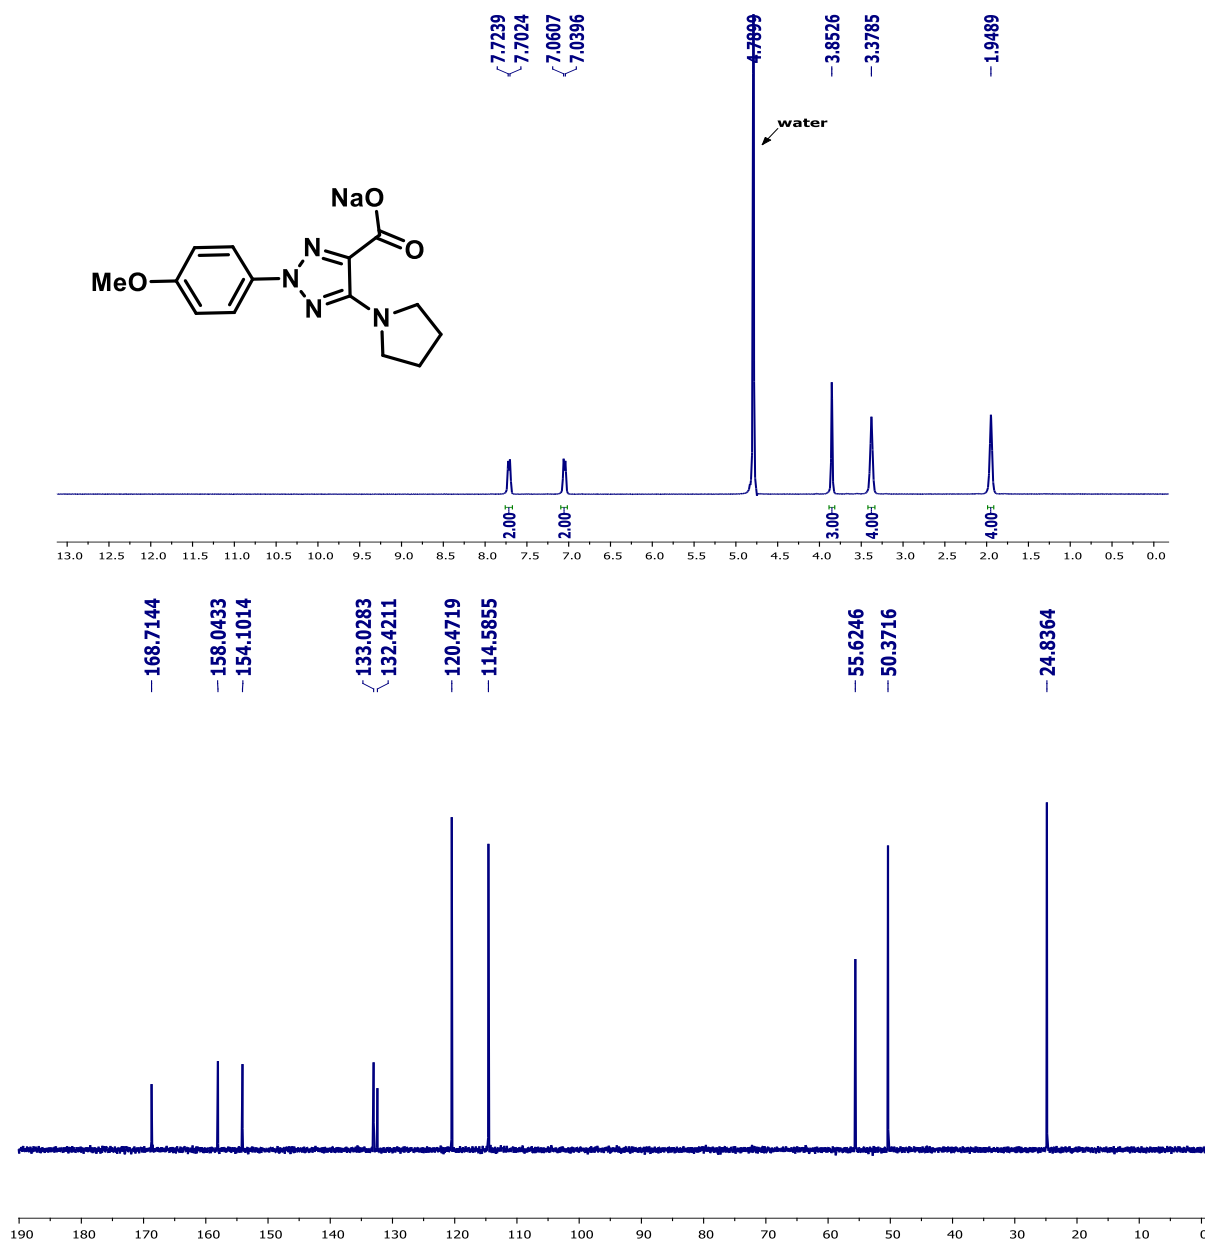

**Fig. S3.** <sup>1</sup>H NMR (400 MHz, D<sub>2</sub>O) and <sup>13</sup>C NMR (100 MHz, D<sub>2</sub>O) spectra of sodium 2-(4-methoxyphenyl)-5-(pyrrolidin-1-yl)-2H-1,2,3-triazole-4-carboxylate (**2a**).



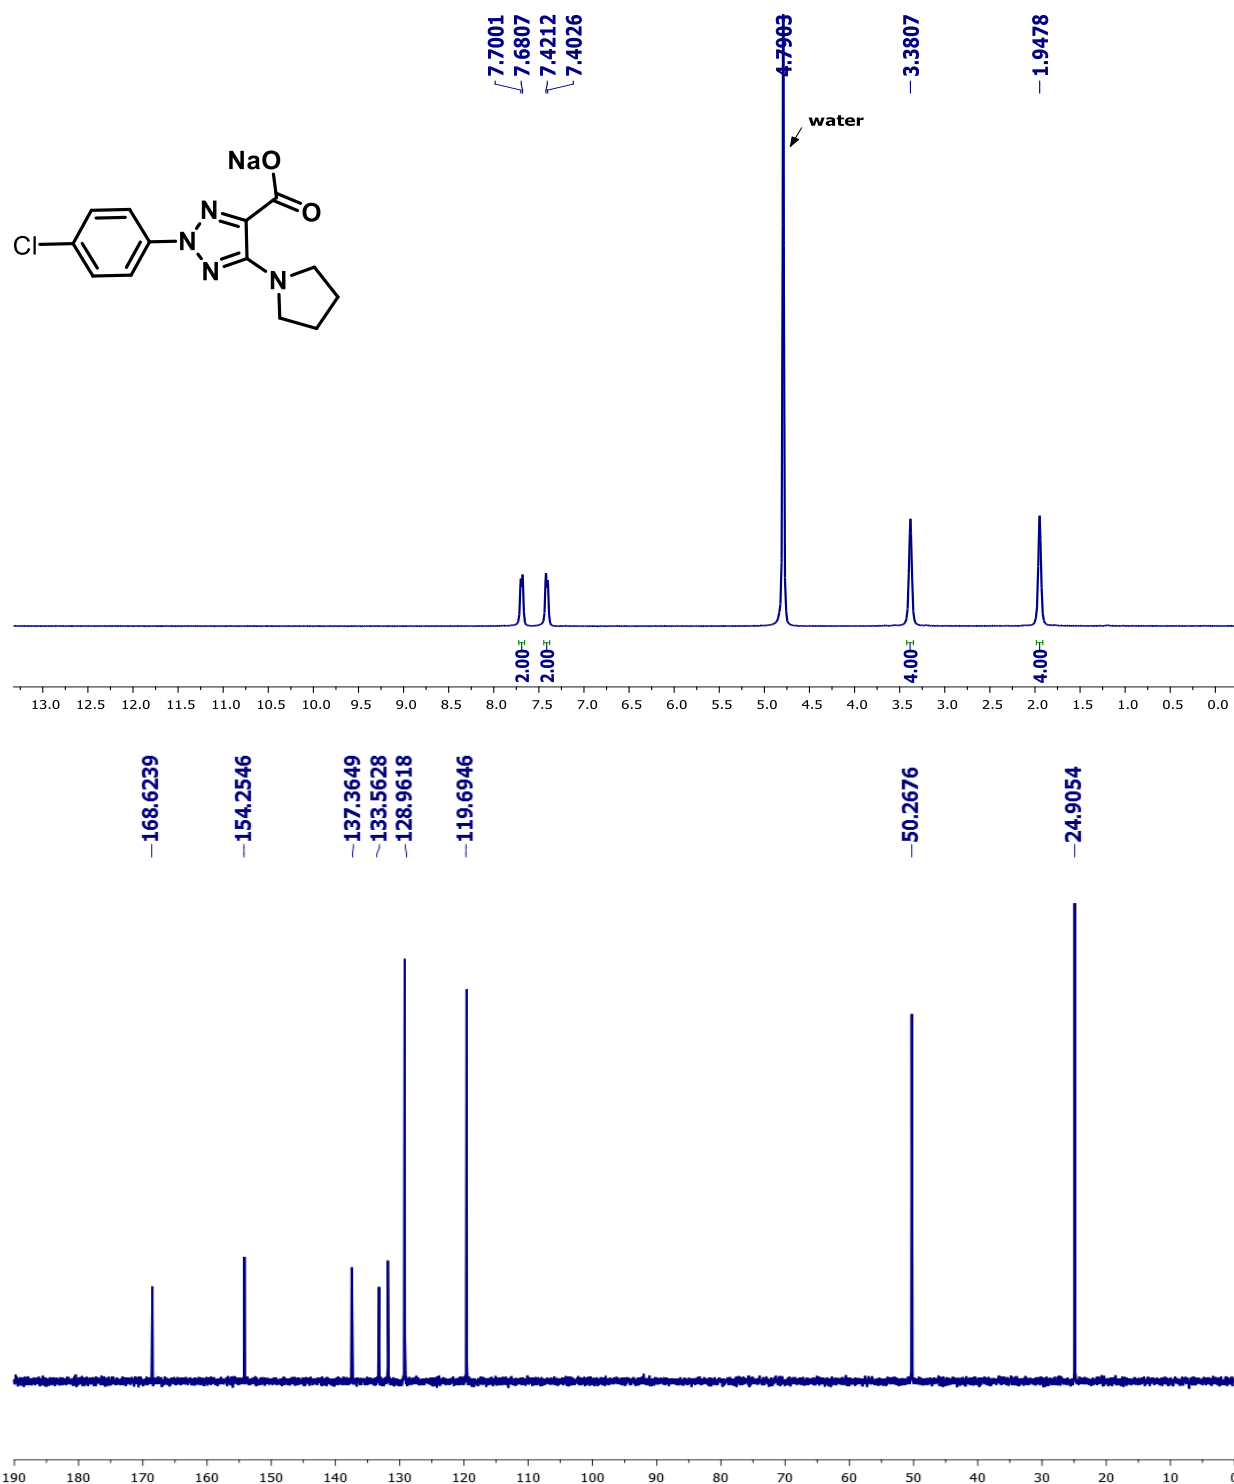

**Fig. S4.** <sup>1</sup>H NMR (400 MHz, D<sub>2</sub>O) and <sup>13</sup>C NMR (100 MHz, D<sub>2</sub>O) spectra of sodium 2-(4-chlorophenyl)-5-(pyrrolidin-1-yl)-2H-1,2,3-triazole-4-carboxylate (**2b**).



### 3. The experimental determination of the pK<sub>a</sub> values of acids **1a** and **1b**

The calculation was based on the ratio of the solution's concentration and pH [3].

This is possible because of the relationship between pK<sub>a</sub> and pH:

$$\text{pH} = \text{pK}_a + \lg ([\text{A}^-] / [\text{AH}]) \quad (1)$$

Where the square brackets are used to indicate the concentrations of the acid and its conjugate base. The equation may be rewritten as:

$$\text{K}_a / [\text{H}^+] = [\text{A}^-] / [\text{AH}]$$

This shows that pK<sub>a</sub> and pH are equal when half of the acid has dissociated. The buffering capacity of a species or its ability to maintain pH of a solution is highest when the pK<sub>a</sub> and pH values are close. So, when selecting a buffer, the best choice is the one that has a pK<sub>a</sub> value close to the target pH of the chemical solution. At half-neutralization the ratio  $[\text{A}^-]/[\text{HA}] = 1$ ; since  $\log(1) = 0$ , the pH at half-neutralization is numerically equal to pK<sub>a</sub>. Conversely, when  $\text{pH} = \text{pK}_a$ , the concentration of HA is equal to the concentration of A<sup>-</sup>. If the pH is known, the ratio may be calculated. This ratio is independent of the analytical concentration of the acid.

A  $5 \times 10^{-5}$  M DMSO-water (1:9, v/v) solutions of ATAs **1a**, **b** are found to have an average pH of 6.38 and 5.81 respectively. The concentration of hydrogen ions can be calculated with the formula  $[\text{H}^+] = 1/10^{\text{pH}}$  M. If the concentration of hydrogen ions  $[\text{H}^+] = 1/10^{\text{pH}} = x$  M, then:

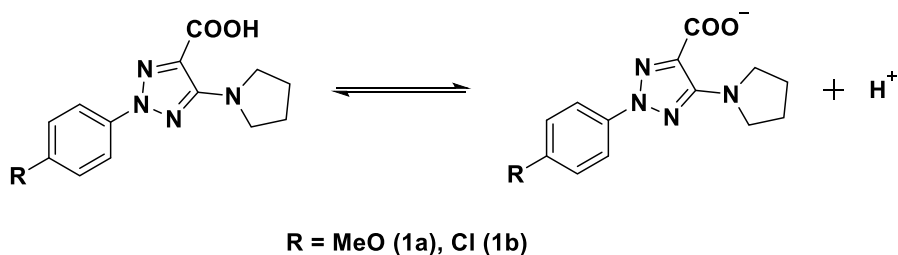

Initial conc:  $5 \cdot 10^{-5}$  M

changes:  $-x$  M  $+x$  M  $+x$  M

equil conc:  $(5 \cdot 10^{-5} - x)$  M  $x$  M  $x$  M

The dissociation constant can be calculated with the formula  $\text{K}_a = [\text{H}^+] \cdot [\text{A}^-] / [\text{HA}]$ . With the known value of  $x$ :  $\text{K}_a = x \cdot x / (5 \cdot 10^{-5} - x) = [\text{H}^+]^2 / ([\text{HA}] - [\text{H}^+])$ .

pH values of **1a**: 6.41, 6.32, 6.40.

pH values of **1b**: 5.78, 5.80, 5.84.



pKa calculation for **1a**:

<sup>1a</sup>pKa<sub>I</sub>:

$$[H^+] = 1/10^{pH} = 1/10^{6.41} = 3.89 \cdot 10^{-7} \text{ M}$$

$$K_a = (3.89 \cdot 10^{-7})^2 \text{ M} / (5 \cdot 10^{-5} - 3.89 \cdot 10^{-7}) = 3.05 \cdot 10^{-9}$$

$$^1a\text{pKa}_I = -\log(K_a) = -\log(3.05 \cdot 10^{-9}) = 8.52$$

pKa values of **1a**, **1b** are calculated with the same method.

Standard deviation and relative standard deviation calculations are also the same for all pKa values of **1a,b**

$$S_{\text{Dev}} = \sqrt{\frac{\sum (pKa - pKa^{\text{avg}})^2}{n - 1}}$$

$$S_{\text{Dev}}^r = \frac{100S}{pKa^{\text{avg}}}$$

Confidential interval  $\Theta$  for pKa values of **1a, b** can be found with Student's t-distribution:

$$\Delta pKa = \pm \frac{St_{p,f}}{\sqrt{n}}, f = n - 1, p = 0.95$$

**Table S1.** Results for the determination of pKa acids **1a** and **1b**

| Compd     | pH   | pKa  | Avg. pKa | S <sub>Dev</sub> | S <sub>Dev</sub> <sup>r</sup> | Δ pKa | CI (Θ)  |
|-----------|------|------|----------|------------------|-------------------------------|-------|---------|
| <b>1a</b> | 6.41 | 8.52 | 8.5      | 0.047            | 0.554                         | ±0.1  | 8.5±0.1 |
|           | 6.37 | 8.43 |          |                  |                               |       |         |
|           | 6.40 | 8.50 |          |                  |                               |       |         |
| <b>1b</b> | 5.78 | 7.24 | 7.3      | 0.061            | 0.837                         | ±0.2  | 7.3±0.2 |
|           | 5.80 | 7.28 |          |                  |                               |       |         |
|           | 5.84 | 7.36 |          |                  |                               |       |         |



#### 4. Photophysical investigations.

UV-Vis absorption spectra were recorded on a Shimadzu UV-1800 spectrometer. Fluorescence of the sample solutions was measured using a Hitachi F-7000 spectrophotometer (Tokyo, Japan). The absorption and emission spectra were recorded in Toluene, Dioxane, CH<sub>2</sub>Cl<sub>2</sub>, EtOH, MeCN, DMSO using 10.00 mm quartz cells. The excitation wavelength was at the absorption maxima. Atmospheric oxygen contained in solutions was not removed. Concentration of the compounds in the solution was  $5.0 \times 10^{-5}$  M and  $5.0 \times 10^{-6}$  M for absorption and fluorescence measurements, respectively. The relative fluorescence quantum yields ( $\Phi_F$ ) were determined using quinine sulfate ( $5 \times 10^{-5}$  M) in 0.1 M H<sub>2</sub>SO<sub>4</sub> as a standard ( $\Phi_F = 0.546$ ).

Absolute quantum yield for solid state and time-resolution study were recorded on Horiba FluoroMax 4 Spectrofluorimeter (Kyoto, Japan) with Quanta- $\phi$  integrating sphere using FluorEssence 3.5 Software.

**Table S2.** Photophysical data of acids **1a**, **b** and salts **2a**, **b** at different concentrations in DMSO, 1,4-dioxane, and MeOH<sup>a</sup>

| Entry | Compd     | Solvent     | Concentration, $\mu$ M | UV-Vis               |                                         | Fluorescence        |       | Stokes shift, nm/cm <sup>-1</sup> |
|-------|-----------|-------------|------------------------|----------------------|-----------------------------------------|---------------------|-------|-----------------------------------|
|       |           |             |                        | $\lambda_{max}$ , nm | $\epsilon$ , M $\cdot$ cm <sup>-1</sup> | $\lambda_{em}$ , nm | QY, % |                                   |
| 1     | <b>1a</b> | 1,4-dioxane | 50                     | 336                  | 11500                                   | 414                 | 57.9  | 78/5607                           |
| 2     |           |             | 30                     | 336                  | 10700                                   | 414                 | 80.8  | 78/5607                           |
| 3     |           |             | 10                     | 337                  | 11200                                   | 414                 | 81.7  | 77/5519                           |
| 4     |           |             | 5                      | 340                  | 10600                                   | 414                 | 90.5  | 74/5257                           |
| 5     |           |             | 1                      | 340                  | 16000                                   | 414                 | 95.3  | 74/5257                           |
| 6     |           | MeOH        | 50                     | 328                  | 13700                                   | 419                 | 34.2  | 91/6621                           |
| 7     |           |             | 30                     | 325                  | 13800                                   | 410                 | 50.8  | 85/6379                           |
| 8     |           |             | 10                     | 325                  | 16100                                   | 406                 | 68.1  | 81/6139                           |
| 9     |           |             | 5                      | 325                  | 14200                                   | 406                 | 81.2  | 81/6139                           |
| 10    |           |             | 1                      | 325                  | 24000                                   | 406                 | 85.4  | 85/6379                           |
| 11    |           | DMSO        | 50                     | 336                  | 12400                                   | 426                 | 49.0  | 90/6288                           |
| 12    |           |             | 30                     | 336                  | 12600                                   | 425                 | 59.7  | 89/6232                           |
| 13    |           |             | 10                     | 334                  | 12500                                   | 425                 | 71.8  | 91/6411                           |
| 14    |           |             | 5                      | 334                  | 12800                                   | 425                 | 78.6  | 91/6411                           |
| 15    |           |             | 1                      | 331                  | 22000                                   | 425                 | 84.7  | 94/6682                           |
| 16    | <b>1b</b> | 1,4-dioxane | 50                     | 342                  | 11150                                   | 421                 | 54.6  | 79/5487                           |
| 17    |           |             | 30                     | 342                  | 11200                                   | 421                 | 76.5  | 79/5487                           |
| 18    |           |             | 10                     | 340                  | 11200                                   | 421                 | 77.0  | 81/5659                           |
| 19    |           |             | 5                      | 340                  | 11400                                   | 421                 | 82.6  | 81/5659                           |
| 20    |           |             | 1                      | 340                  | 15000                                   | 421                 | 91.3  | 81/5659                           |
| 21    |           | MeOH        | 50                     | 336                  | 13800                                   | 433                 | 26.9  | 97/6667                           |
| 22    |           |             | 30                     | 333                  | 14100                                   | 419                 | 38.1  | 86/6164                           |
| 23    |           |             | 10                     | 332                  | 15700                                   | 413                 | 42.0  | 81/5907                           |
| 24    |           |             | 5                      | 332                  | 17800                                   | 413                 | 43.5  | 81/5907                           |
| 25    |           |             | 1                      | 332                  | 18000                                   | 412                 | 56.8  | 85/5849                           |
| 26    |           | DMSO        | 50                     | 342                  | 11800                                   | 441                 | 45.2  | 99/6564                           |
| 27    |           |             | 30                     | 340                  | 12000                                   | 440                 | 59.3  | 100/6684                          |
| 28    |           |             | 10                     | 340                  | 12000                                   | 440                 | 72.5  | 100/6684                          |
| 29    |           |             | 5                      | 340                  | 11800                                   | 440                 | 73.1  | 100/6684                          |
| 30    |           |             | 1                      | 340                  | 20000                                   | 440                 | 80.5  | 100/6684                          |
| 31    | <b>2a</b> | DMSO        | 50                     | 328                  | 20000                                   | 395                 | 1.2   | 67/5171                           |
| 32    |           |             | 30                     | 328                  | 20100                                   | 399                 | 3.0   | 71/5425                           |
| 33    |           |             | 10                     | 326                  | 20300                                   | 400                 | 4.9   | 74/5675                           |
| 34    |           |             | 5                      | 321                  | 20000                                   | 416                 | 10.6  | 95/7114                           |
| 35    |           |             | 1                      | 321                  | 44000                                   | 422                 | 17.0  | 101/7456                          |



|    |           |      |    |     |       |     |     |         |
|----|-----------|------|----|-----|-------|-----|-----|---------|
| 36 | <b>2b</b> | DMSO | 50 | 340 | 18000 | 408 | 0.7 | 68/4902 |
| 37 |           |      | 30 | 340 | 18100 | 408 | 1.2 | 68/4902 |
| 38 |           |      | 10 | 340 | 18800 | 408 | 2.0 | 68/4902 |
| 39 |           |      | 5  | 340 | 19000 | 413 | 3.2 | 73/5199 |
| 40 |           |      | 1  | 340 | 33000 | 435 | 7.4 | 95/6423 |

*a* - Concentration for absorption measurements,  $c = 5 \times 10^{-5}$  M; for fluorescence spectra,  $c = 5 \times 10^{-6}$  M and  $\lambda_{\text{ex}} = \lambda_{\text{abs}}$ .

**Table S3.** Photophysical investigation data for acids **1a**, **b** in different concentrations in mixture of DMSO-H<sub>2</sub>O, 1,4-dioxane-H<sub>2</sub>O, MeOH-H<sub>2</sub>O (v/v, 1/9) and salts **2a**, **b** in H<sub>2</sub>O

| Entry | Compd     | Solvent           | Concentration<br>n, $\mu\text{M}$ | UV-Vis                      |                                           | Fluorescence               |       | Stokes shift,<br>$\text{nm}/\text{cm}^{-1}$ |
|-------|-----------|-------------------|-----------------------------------|-----------------------------|-------------------------------------------|----------------------------|-------|---------------------------------------------|
|       |           |                   |                                   | $\lambda_{\text{max}}$ , nm | $\epsilon$ , $\text{M}\cdot\text{L}^{-1}$ | $\lambda_{\text{em}}$ , nm | QY, % |                                             |
| 1     | <b>1a</b> | 1,4-dioxane-water | 50                                | 322                         | 11400                                     | 420                        | 34    | 98/7246                                     |
| 2     |           |                   | 10                                | 322                         | 12500                                     | 420                        | 65    | 99/7343                                     |
| 3     |           |                   | 5                                 | 322                         | 13000                                     | 420                        | 66    | 98/7246                                     |
| 4     |           |                   | 1                                 | 316                         | 15000                                     | 420                        | 70    | 104/7836                                    |
| 5     |           | MeOH-water        | 50                                | 320                         | 15000                                     | 421                        | 26    | 101/7497                                    |
| 6     |           |                   | 10                                | 320                         | 15100                                     | 420                        | 60    | 100/7440                                    |
| 7     |           |                   | 5                                 | 320                         | 15200                                     | 420                        | 61    | 100/7440                                    |
| 8     |           |                   | 1                                 | 320                         | 25000                                     | 420                        | 62    | 100/7440                                    |
| 9     |           | DMSO-water        | 50                                | 322                         | 12000                                     | 422                        | 30    | 100/7359                                    |
| 10    |           |                   | 10                                | 322                         | 12800                                     | 421                        | 60    | 99/7303                                     |
| 11    |           |                   | 5                                 | 322                         | 13200                                     | 420                        | 64    | 98/7246                                     |
| 12    |           |                   | 1                                 | 322                         | 16000                                     | 420                        | 88    | 100/7359                                    |
| 13    | <b>1b</b> | 1,4-dioxane-water | 50                                | 328                         | 11600                                     | 431                        | 21    | 103/7286                                    |
| 14    |           |                   | 10                                | 328                         | 11900                                     | 430                        | 40    | 102/7232                                    |
| 15    |           |                   | 5                                 | 328                         | 13000                                     | 430                        | 42    | 102/7232                                    |
| 16    |           |                   | 1                                 | 323                         | 21000                                     | 430                        | 46    | 107/7704                                    |
| 17    |           | MeOH-water        | 50                                | 327                         | 13000                                     | 431                        | 19    | 104/7459                                    |
| 18    |           |                   | 10                                | 325                         | 11200                                     | 429                        | 42    | 104/7459                                    |
| 19    |           |                   | 5                                 | 325                         | 12200                                     | 429                        | 47    | 104/7459                                    |
| 20    |           |                   | 1                                 | 325                         | 19000                                     | 429                        | 56    | 104/7459                                    |
| 21    |           | DMSO-water        | 50                                | 328                         | 12400                                     | 431                        | 20    | 103/7286                                    |
| 22    |           |                   | 10                                | 329                         | 13000                                     | 431                        | 39    | 102/7193                                    |
| 23    |           |                   | 5                                 | 330                         | 13200                                     | 430                        | 44    | 100/7047                                    |
| 24    |           |                   | 1                                 | 330                         | 20000                                     | 430                        | 51    | 100/7047                                    |
| 25    | <b>2a</b> | water             | 50                                | 320                         | 12300                                     | 423                        | 31    | 103/7609                                    |
| 26    |           |                   | 10                                | 320                         | 12300                                     | 423                        | 64    | 103/7609                                    |
| 27    |           |                   | 5                                 | 320                         | 12600                                     | 423                        | 68    | 103/7609                                    |
| 28    |           |                   | 1                                 | 320                         | 17000                                     | 423                        | 80    | 103/7609                                    |
| 29    | <b>2b</b> | water             | 50                                | 326                         | 13000                                     | 432                        | 19    | 106/7527                                    |
| 30    |           |                   | 10                                | 326                         | 12400                                     | 432                        | 42    | 106/7527                                    |
| 31    |           |                   | 5                                 | 325                         | 12600                                     | 432                        | 44    | 107/7621                                    |
| 32    |           |                   | 1                                 | 325                         | 17000                                     | 432                        | 46    | 107/7621                                    |



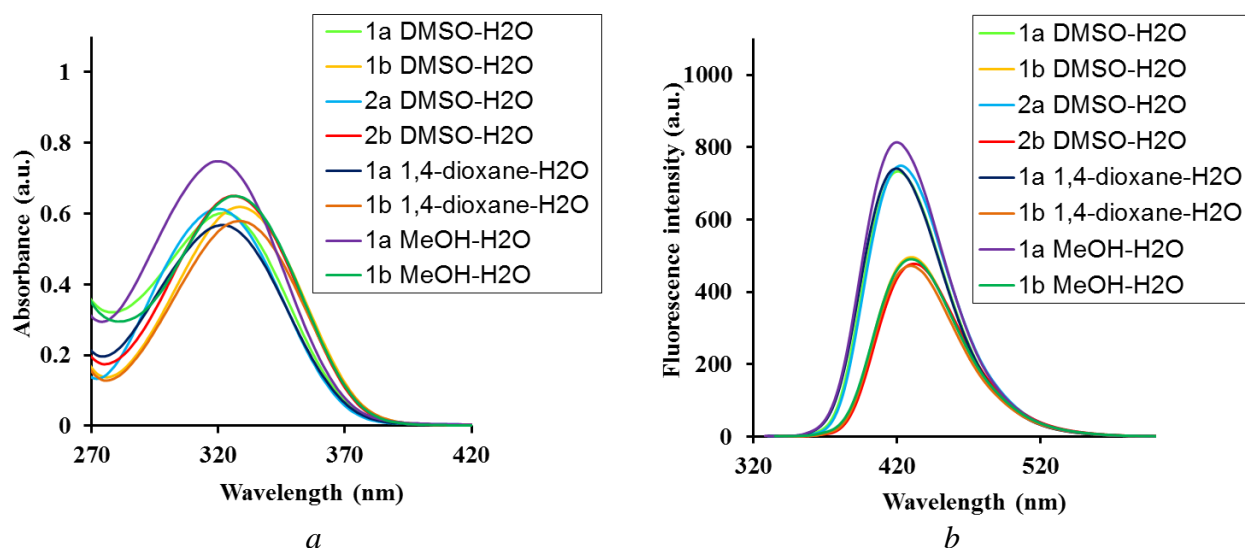

**Fig. S5.** (a) Absorption and (b) fluorescence spectra of acids **1a**, **b** and salts **2a**, **b** in a solvent-H<sub>2</sub>O mixture (v/v 1/9). Concentration for absorption measurements,  $c = 5 \times 10^{-5}$  M; for fluorescence spectra,  $c = 5 \times 10^{-6}$  M and  $\lambda_{\text{ex}} = \lambda_{\text{abs}}$ .

**Table S4.** Lifetime values of **1a**, **b** and **2a**, **b** obtained in DMSO, DMSO-H<sub>2</sub>O (D-W, 1/9, v/v), Dioxane, Dioxane-H<sub>2</sub>O (Diox-W, 1/9, v/v), MeOH, MeOH-H<sub>2</sub>O (MeOH-W, 1/9, v/v), H<sub>2</sub>O  $c = 5 \times 10^{-6}$  M

| Entry | Compd     | Compd   | $\tau_1^a$ (ns) | $A_1^b$ | $\tau_2^a$ (ns) | $A_2^b$ | $\tau_3^a$ (ns) | $A_3^b$ | $\langle \tau \rangle_f^c$ (ns) | $\chi^2$ <sup>d</sup> |
|-------|-----------|---------|-----------------|---------|-----------------|---------|-----------------|---------|---------------------------------|-----------------------|
| 1     | <b>1a</b> | DMSO    | 3.02            | 0.21    | 6.78            | 0.79    |                 |         | 5.99                            | 1.15                  |
| 2     | <b>1a</b> | D-W     | 2.83            | 0.35    | 4.50            | 0.65    |                 |         | 3.92                            | 1.02                  |
| 3     | <b>1b</b> | DMSO    | 3.31            | 0.22    | 7.67            | 0.78    |                 |         | 6.71                            | 1.06                  |
| 4     | <b>1b</b> | D-W     | 2.58            | 0.70    | 4.80            | 0.30    |                 |         | 3.25                            | 1.17                  |
| 5     | <b>1a</b> | Dioxane | 2.48            | 0.31    | 5.74            | 0.69    |                 |         | 4.73                            | 1.19                  |
| 6     | <b>1a</b> | Diox-W  | 1.87            | 0.15    | 3.93            | 0.85    |                 |         | 3.62                            | 1.08                  |
| 7     | <b>1b</b> | Dioxane | 2.61            | 0.35    | 6.35            | 0.64    |                 |         | 4.87                            | 1.11                  |
| 8     | <b>1b</b> | Diox-W  | 2.43            | 0.59    | 4.01            | 0.41    |                 |         | 3.07                            | 1.06                  |
| 9     | <b>1a</b> | MeOH    | 2.65            | 0.62    | 5.09            | 0.38    |                 |         | 3.58                            | 1.00                  |
| 10    | <b>1a</b> | MeOH-W  | 2.69            | 0.26    | 4.17            | 0.74    |                 |         | 3.78                            | 1.11                  |
| 11    | <b>1b</b> | MeOH    | 1.93            | 0.83    | 5.51            | 0.17    |                 |         | 2.54                            | 1.02                  |
| 12    | <b>1b</b> | MeOH-W  | 2.47            | 0.62    | 3.74            | 0.38    |                 |         | 2.95                            | 1.13                  |
| 13    | <b>2a</b> | DMSO    | 1.81            | 0.10    | 6.74            | 0.90    |                 |         | 6.25                            | 1.11                  |
| 14    | <b>2a</b> | Water   | 2.51            | 0.16    | 4.15            | 0.84    |                 |         | 3.89                            | 1.15                  |
| 15    | <b>2b</b> | DMSO    | 0.28            | 0.39    | 1.27            | 0.08    | 7.58            | 0.52    | 4.15                            | 1.02                  |
| 16    | <b>2b</b> | Water   | 2.34            | 0.26    | 3.35            | 0.74    |                 |         | 3.08                            | 1.14                  |

<sup>a</sup>Fluorescence lifetime. <sup>b</sup>Fractional contribution. <sup>c</sup>Weighted mean lifetime. <sup>d</sup> $\chi^2$ -Chi-squared.



**Table S5.** Lifetime values of **1a,b** and **2a,b** obtained in DMSO, DMSO-H<sub>2</sub>O (D-W, 1/9, v/v), Dioxane, Dioxane- H<sub>2</sub>O (Diox-W, 1/9, v/v), MeOH, MeOH-H<sub>2</sub>O (MeOH-W, 1/9, v/v), H<sub>2</sub>O  $c = 1 \times 10^{-6}$  M

| Entry | Compd     | Solvent          | $\tau_1^a$ (ns) | $A_1^b$ | $\tau_2^a$ (ns) | $A_2^b$ | $\tau_3^a$ (ns) | $A_3^b$ | $\langle\tau\rangle_f^c$ (ns) | $\chi^2$ <sup>d</sup> |
|-------|-----------|------------------|-----------------|---------|-----------------|---------|-----------------|---------|-------------------------------|-----------------------|
| 1     | <b>1a</b> | DMSO             | 2.20            | 0.22    | 6.65            | 0.78    |                 |         | 5.67                          | 1.08                  |
| 2     | <b>1a</b> | DMSO-W           | 2.81            | 0.38    | 6.22            | 0.62    |                 |         | 4.92                          | 1.19                  |
| 3     | <b>1b</b> | DMSO             | 2.10            | 0.08    | 7.62            | 0.92    |                 |         | 7.18                          | 1.10                  |
| 4     | <b>1b</b> | D-W              | 2.70            | 0.65    | 3.42            | 0.35    |                 |         | 2.95                          | 1.12                  |
| 5     | <b>1a</b> | Dioxane          | 0.98            | 0.25    | 5.73            | 0.75    |                 |         | 4.54                          | 1.01                  |
| 6     | <b>1a</b> | Diox-W           | 1.03            | 0.25    | 3.85            | 0.75    |                 |         | 3.15                          | 1.06                  |
| 7     | <b>1b</b> | Dioxane          | 1.08            | 0.16    | 6.25            | 0.84    |                 |         | 5.42                          | 1.07                  |
| 8     | <b>1b</b> | Diox-W           | 1.09            | 0.19    | 2.96            | 0.67    | 4.98            | 0.14    | 2.89                          | 1.19                  |
| 9     | <b>1a</b> | MeOH             | 0.61            | 0.12    | 2.56            | 0.58    | 4.96            | 0.30    | 3.05                          | 1.01                  |
| 10    | <b>1a</b> | MeOH-W           | 0.55            | 0.60    | 3.94            | 0.94    |                 |         | 4.03                          | 1.12                  |
| 11    | <b>1b</b> | MeOH             | 2.01            | 0.85    | 5.36            | 0.15    |                 |         | 2.51                          | 1.05                  |
| 12    | <b>1b</b> | MeOH-W           | 2.78            | 0.62    | 3.68            | 0.38    |                 |         | 3.12                          | 1.18                  |
| 13    | <b>2a</b> | DMSO             | 2.04            | 0.09    | 6.68            | 0.91    |                 |         | 6.26                          | 1.16                  |
| 14    | <b>2a</b> | H <sub>2</sub> O | 1.95            | 0.01    | 3.98            | 0.99    |                 |         | 3.96                          | 1.07                  |
| 15    | <b>2b</b> | DMSO             | 2.94            | 0.11    | 7.66            | 0.78    | 0.89            | 0.11    | 6.40                          | 1.14                  |
| 16    | <b>2b</b> | H <sub>2</sub> O | 2.18            | 0.07    | 3.28            | 0.93    |                 |         | 3.20                          | 1.07                  |

<sup>a</sup> Fluorescence lifetime. <sup>b</sup> Fractional contribution. <sup>c</sup> Weighted mean lifetime. <sup>d</sup>  $\chi^2$ -Chi-squared.



## 5. NMR spectra of acids 1a and 1b in different solvents

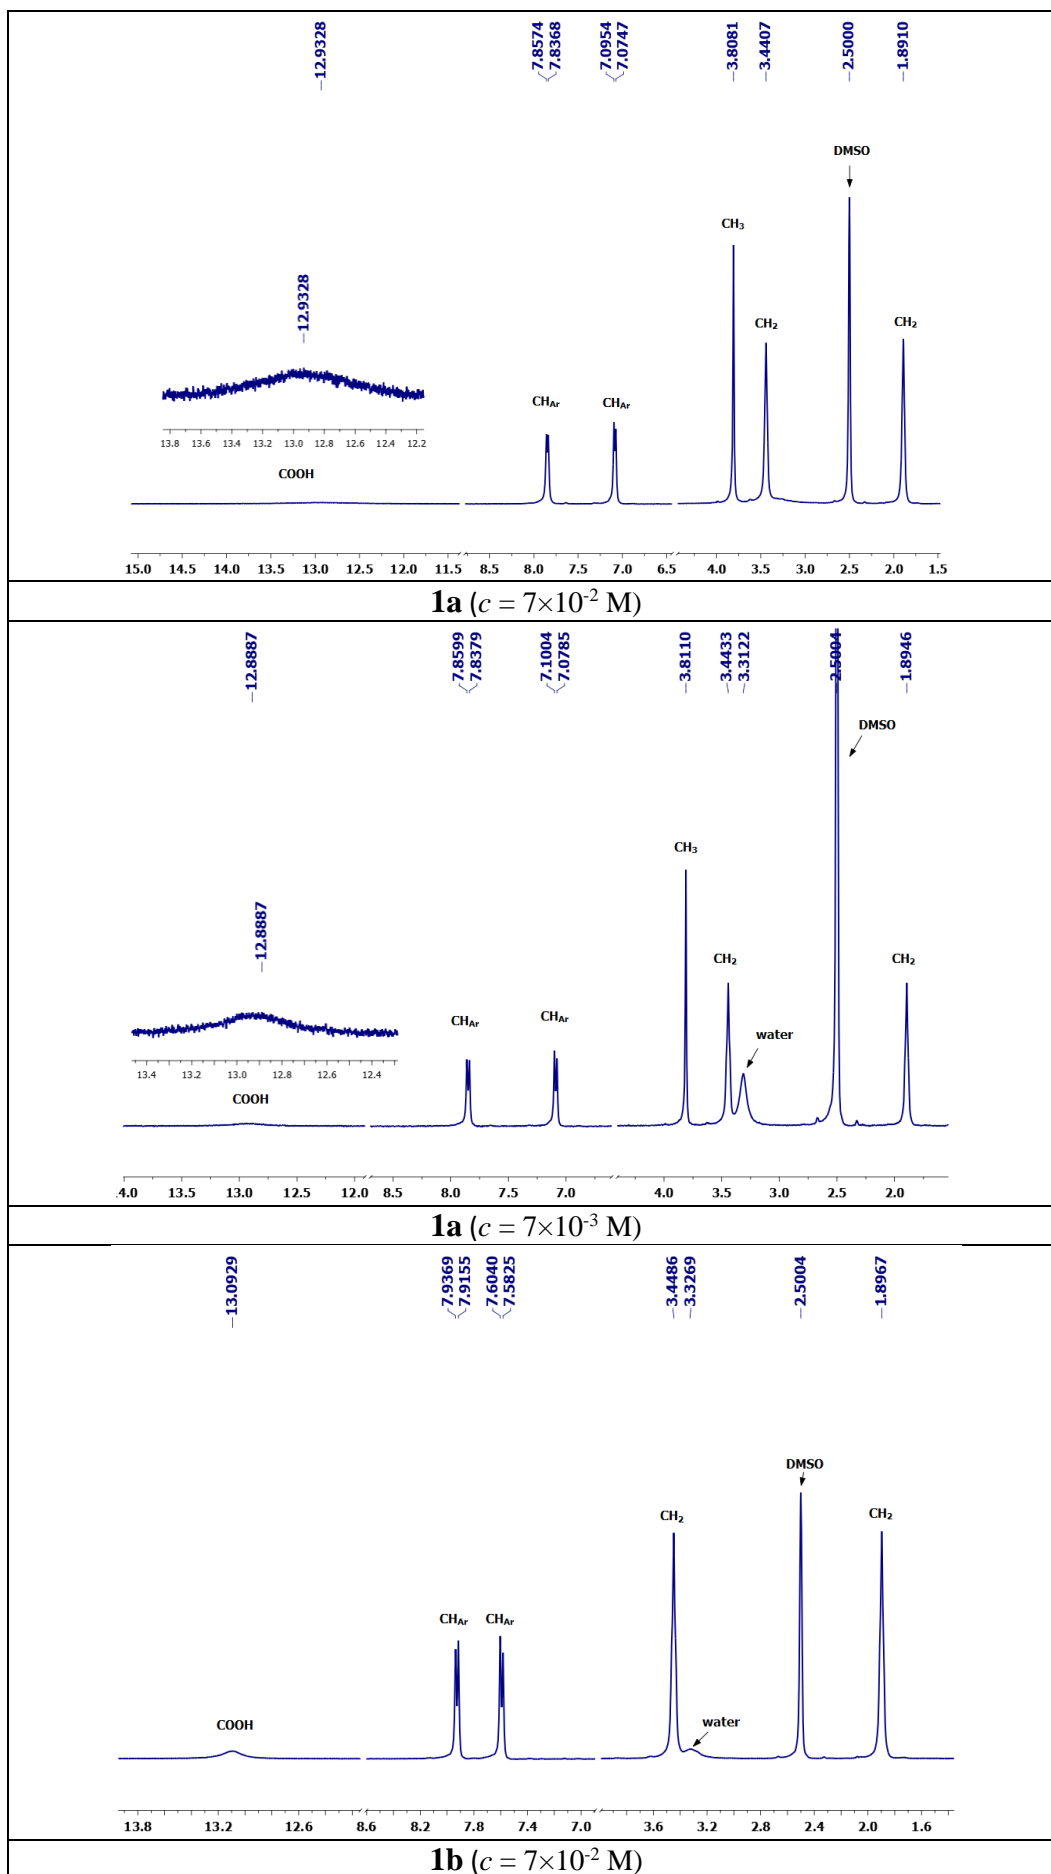



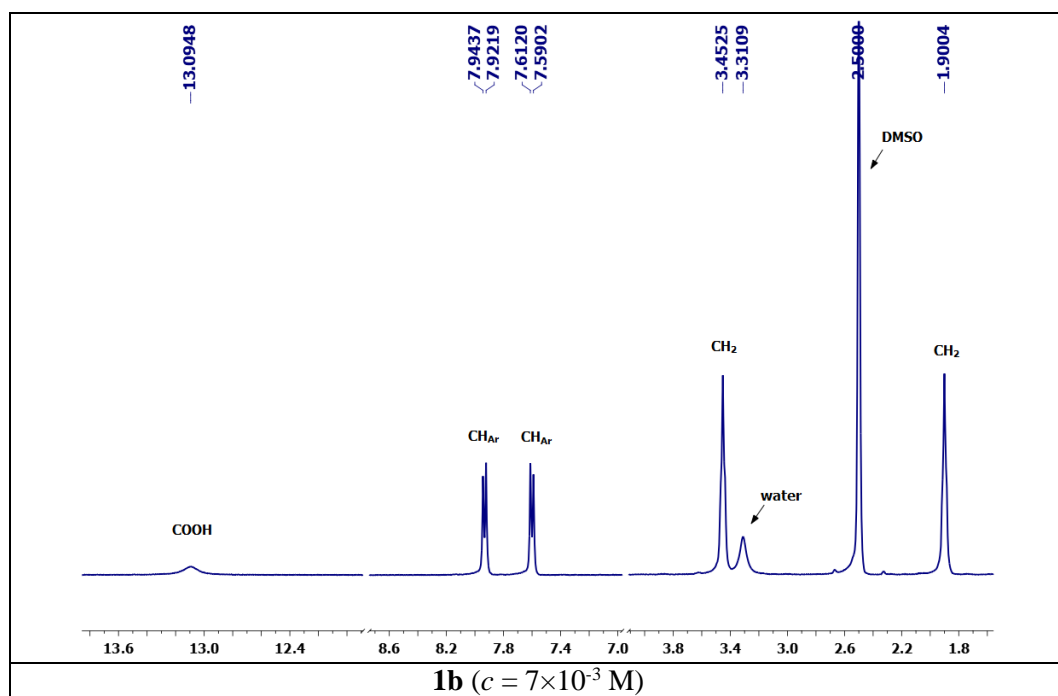

**Fig. S6.**  $^1\text{H}$  NMR  $^1\text{H}$  spectra for the acids **1a** and **1b** in DMSO- $\text{d}_6$

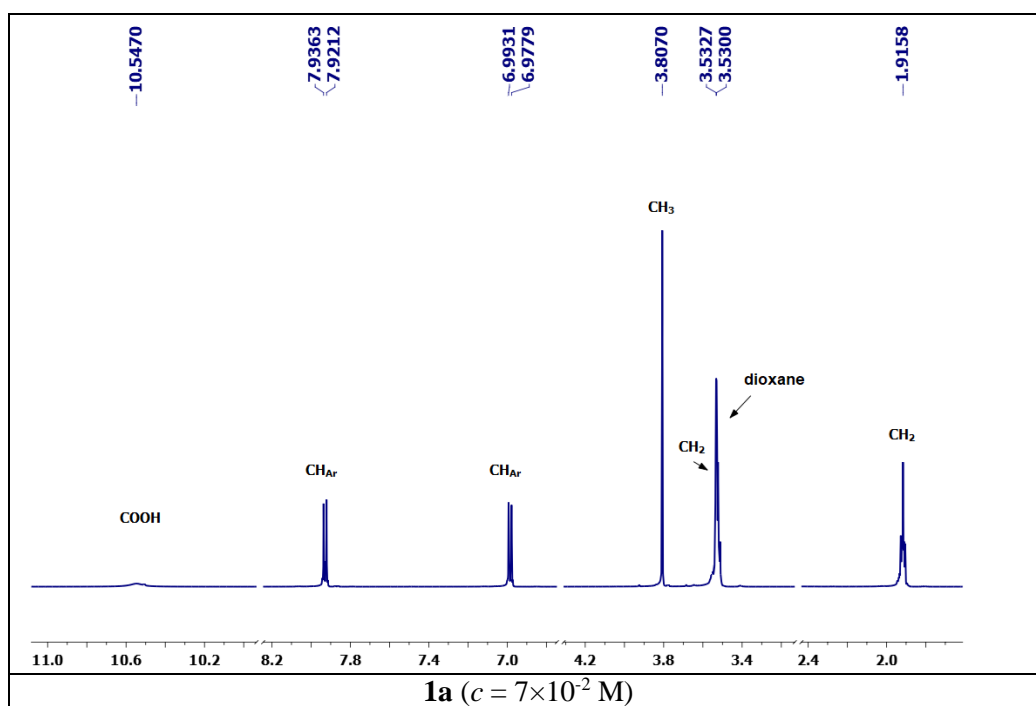



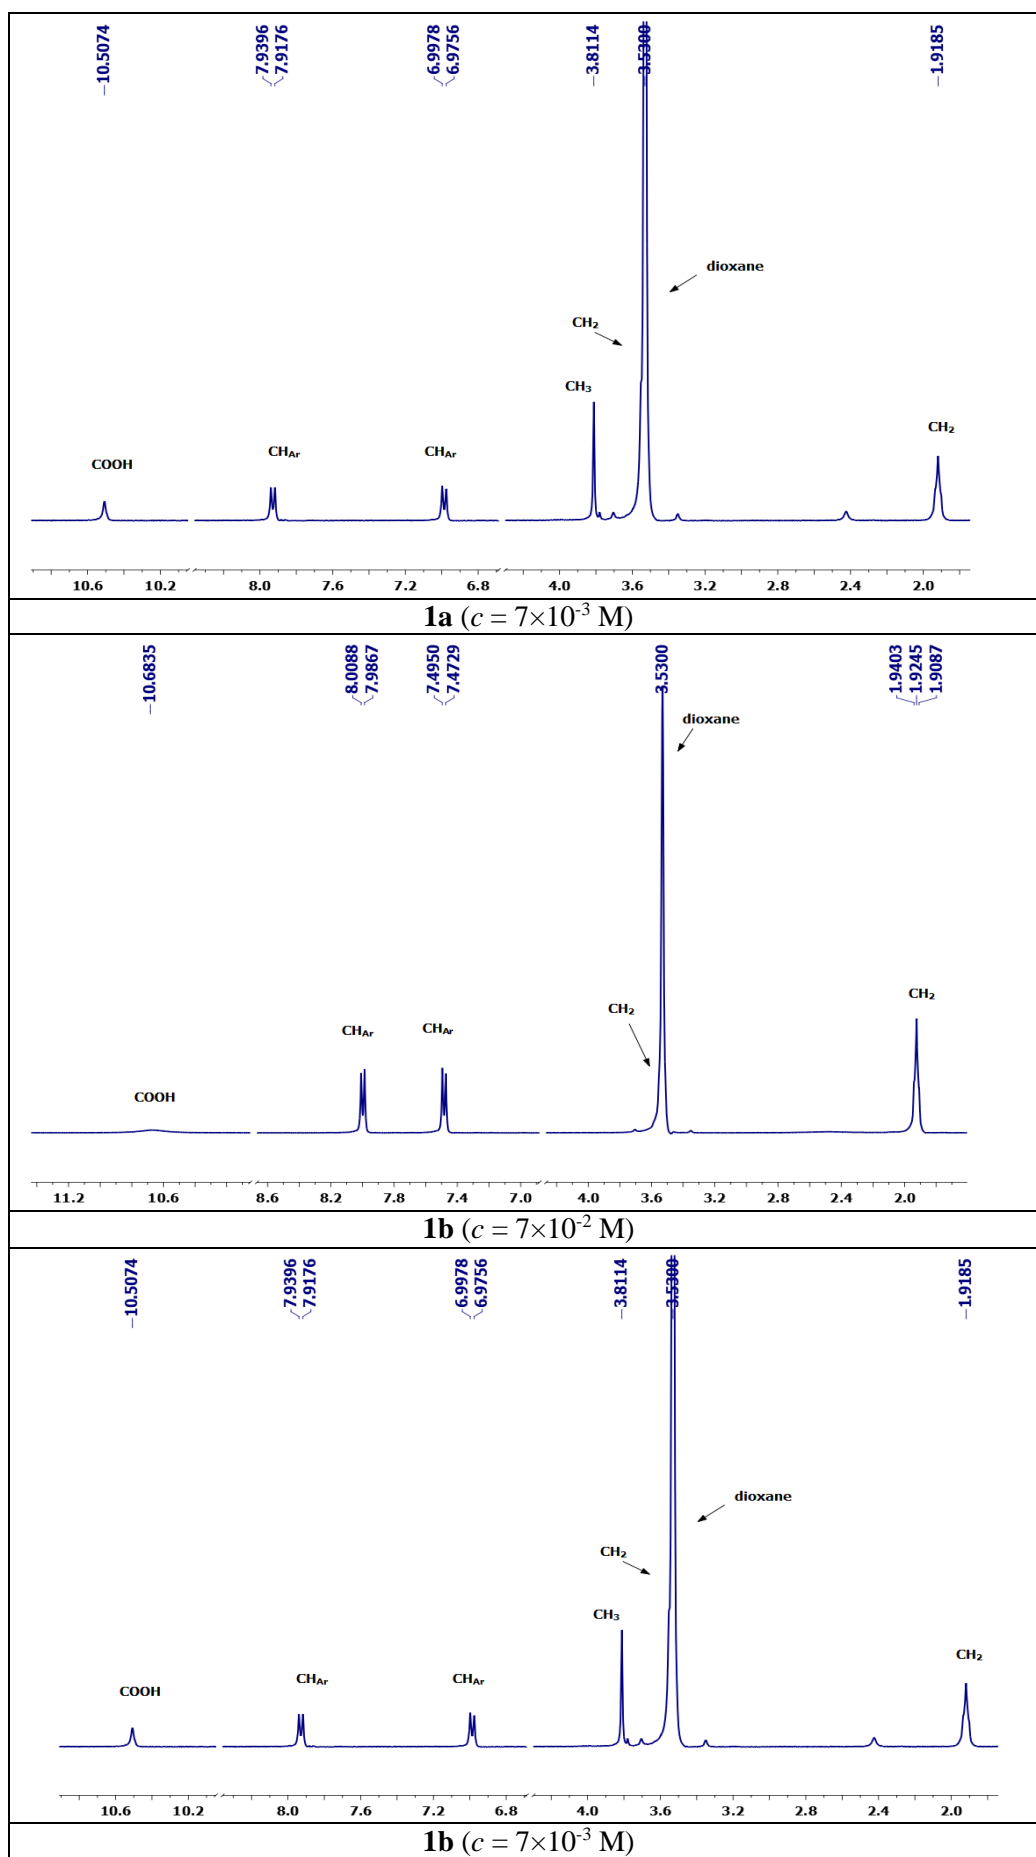

**Fig. S7.**  $^1\text{H}$  NMR spectra for the acids **1a** and **1b** in  $1,4\text{-dioxane-}d_8$



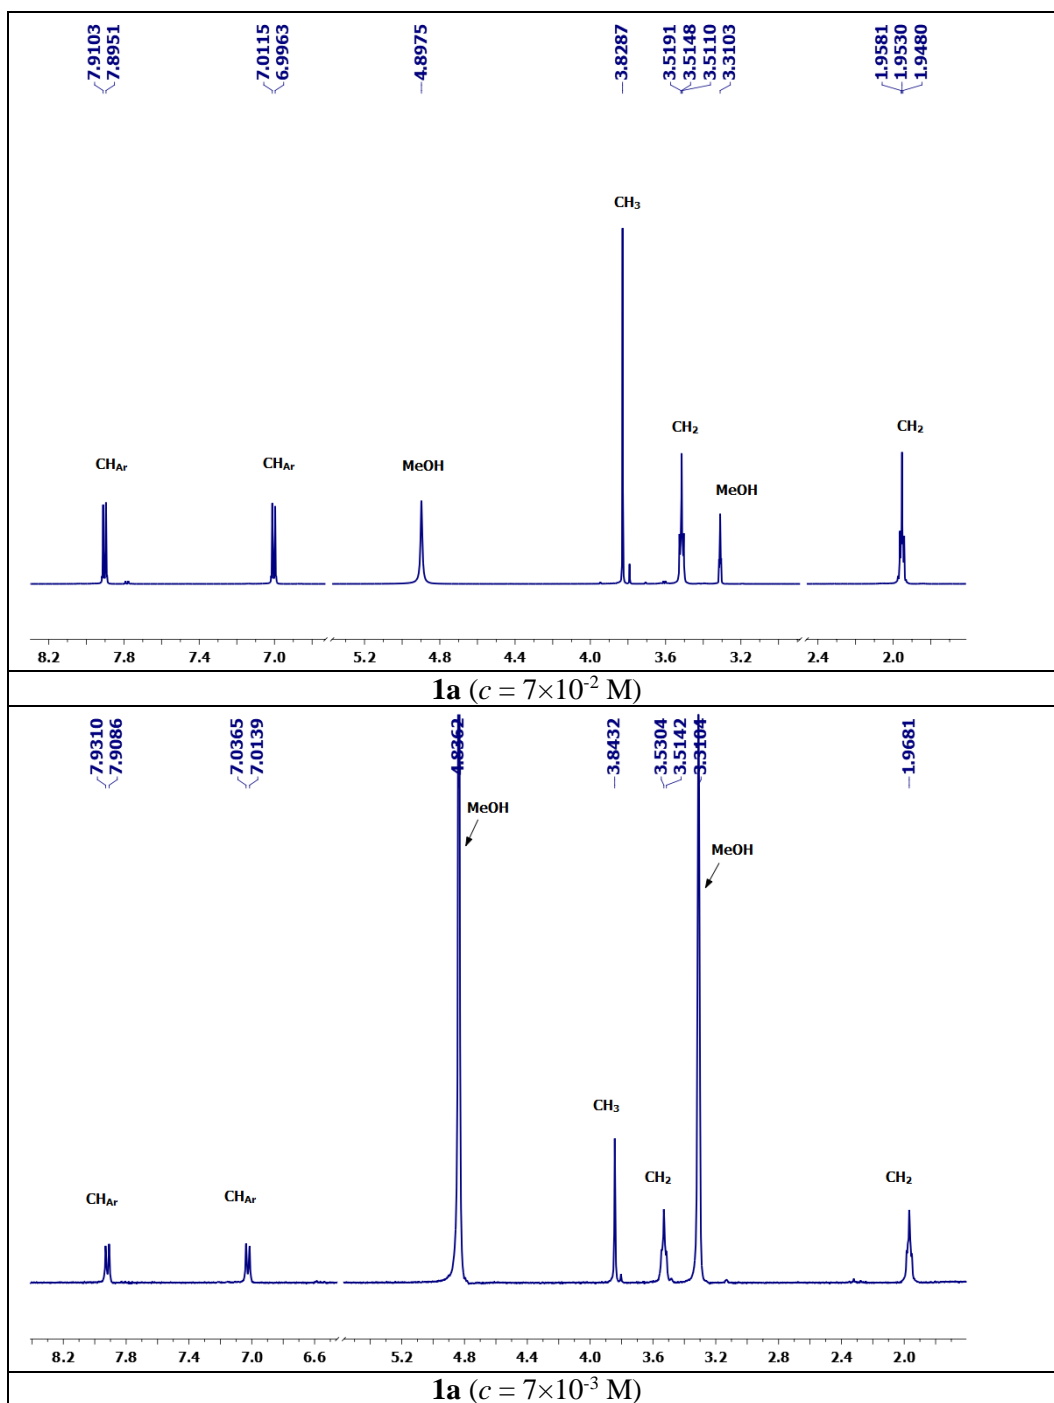



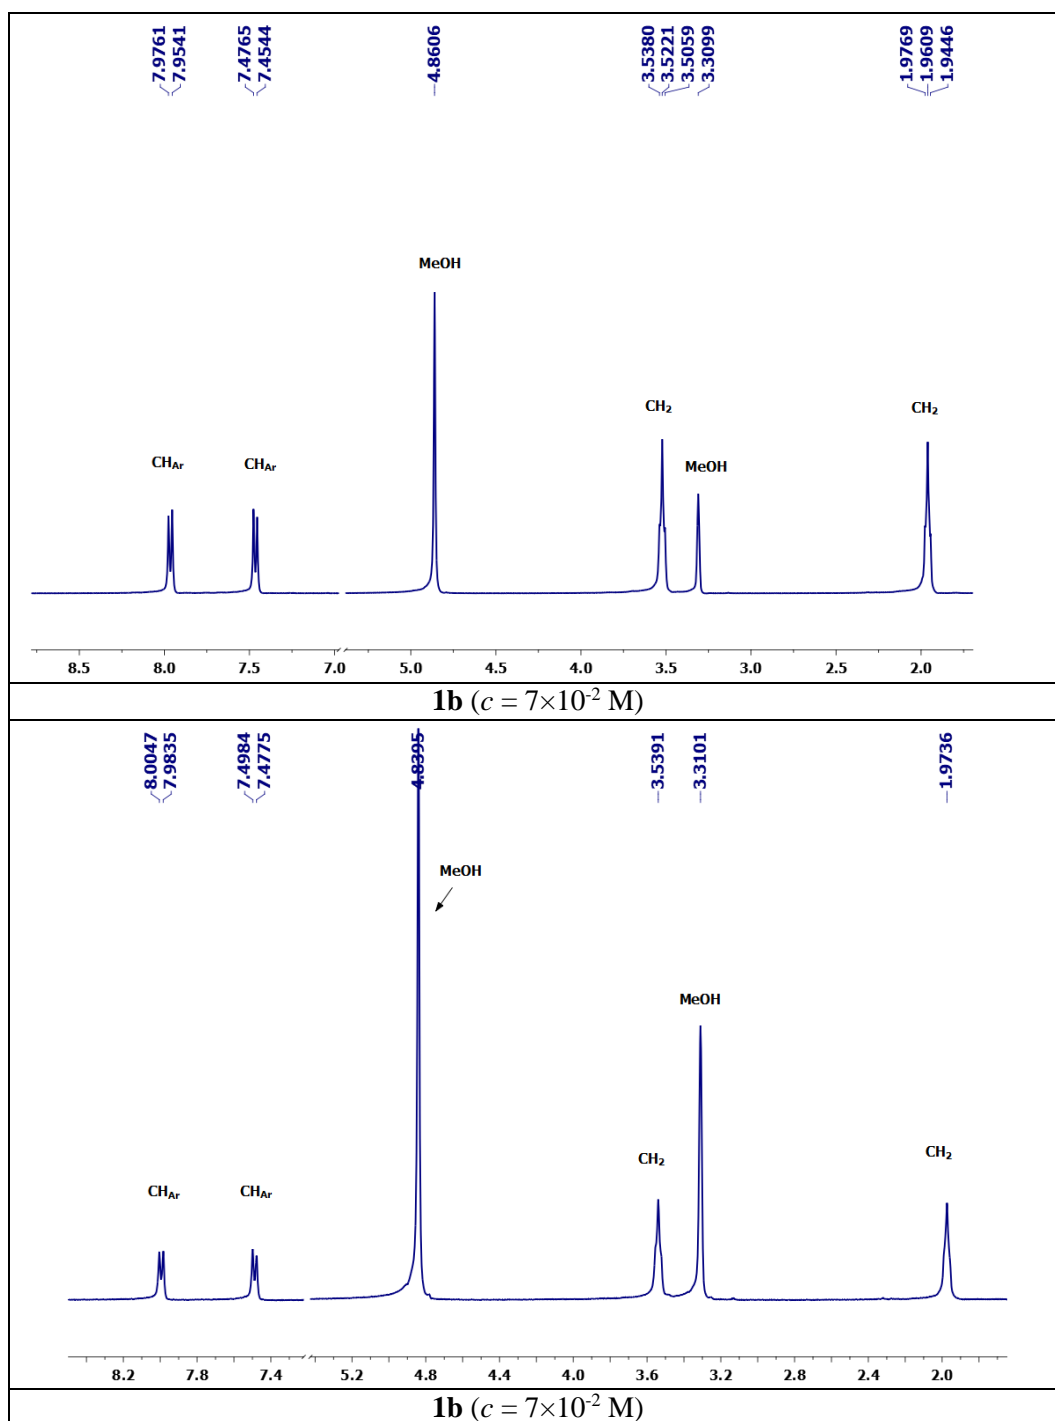

**Fig. S8.**  $^1\text{H}$  NMR spectra for the acids **1a** and **1b** in  $\text{MeOH-d}_4$



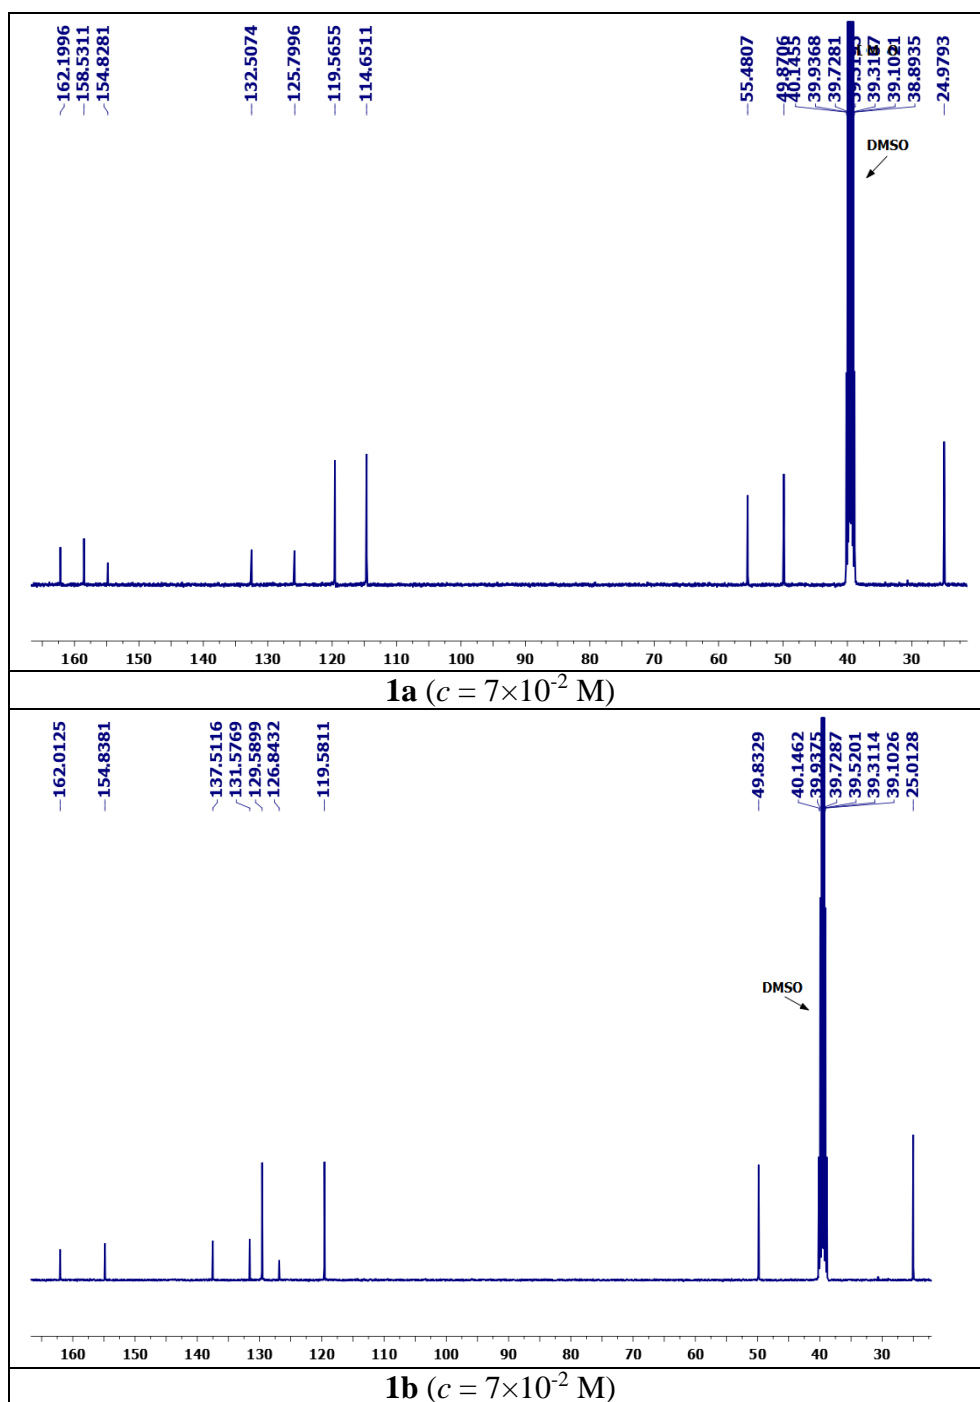

**Fig. S9.**  $^{13}\text{C}$  NMR spectra for the acids **1a** and **1b** in  $\text{DMSO-d}_6$



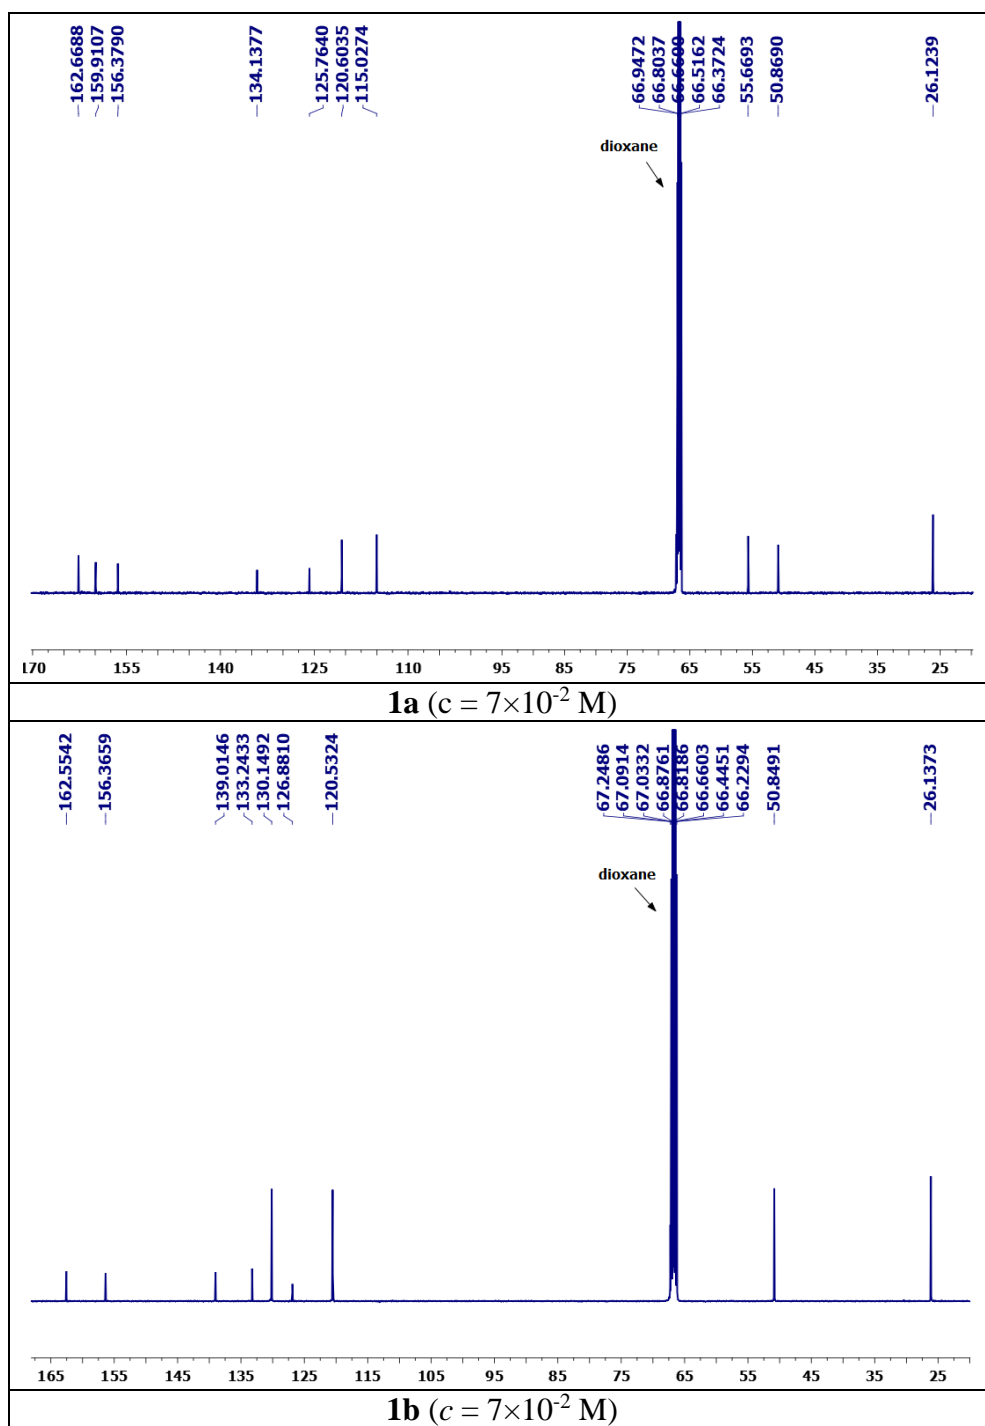

**Fig. S10.**  $^{13}\text{C}$  NMR spectra for the acids **1a** and **1b** in 1,4-dioxane- $\text{d}_8$



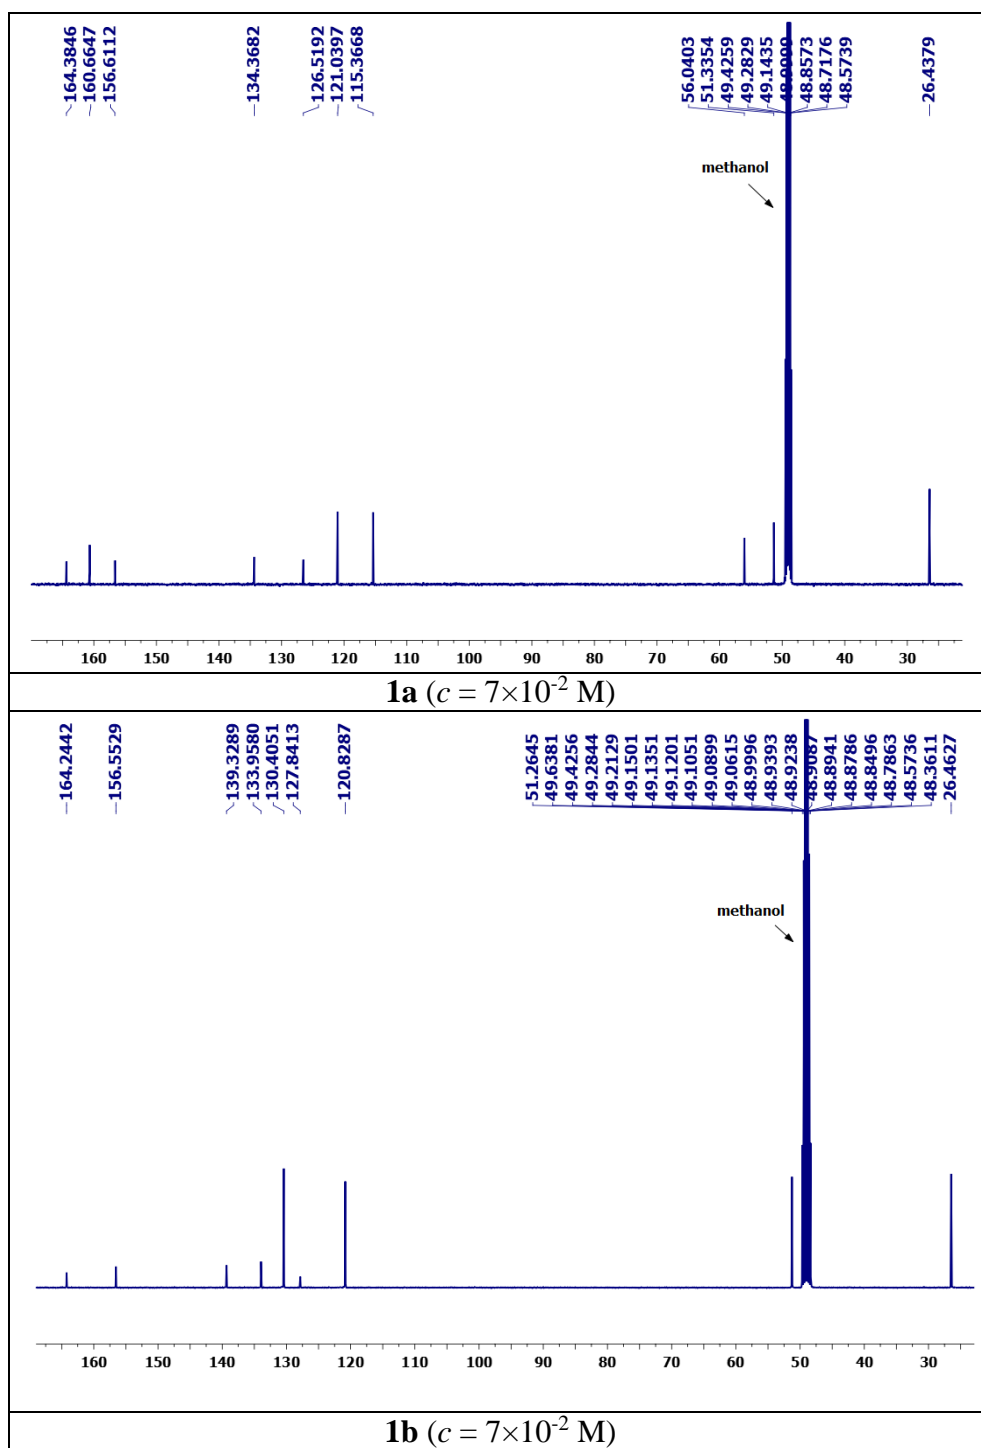

**Fig. S11.**  $^{13}\text{C}$  NMR Spectra for the acids **1a** and **1b** in  $\text{MeOH-d}_4$



**Table S6a.** Calculated  $^1\text{H}$  NMR Chemical Shifts in compounds **1a** and **1b** in gas phase and in different solvents.

| Compound  | solvent     | CH <sub>2</sub><br>H16' | CH <sub>2</sub><br>H16 | CH <sub>2</sub><br>H17' | CH <sub>2</sub><br>H17 | CH <sub>2</sub><br>H15' | CH <sub>2</sub><br>H15 | CH <sub>2</sub><br>H18 | CH <sub>2</sub><br>H18' | OMe<br>H19,H19' | OMe<br>H19'' | CH <sub>Ar</sub><br>H6 | CH <sub>Ar</sub><br>H2 | CH <sub>Ar</sub><br>H3 | CH <sub>Ar</sub><br>H5 | COOH<br>H13 |
|-----------|-------------|-------------------------|------------------------|-------------------------|------------------------|-------------------------|------------------------|------------------------|-------------------------|-----------------|--------------|------------------------|------------------------|------------------------|------------------------|-------------|
| <b>1a</b> | Gas         | 2.19                    | 2.09                   | 2.09                    | 2.09                   | 3.53                    | 3.83                   | 3.01                   | 5.18                    | 3.91            | 4.17         | 7.44                   | 7.44                   | 8.54                   | 8.71                   | 6.34        |
|           | Methanol    | 2.19                    | 2.09                   | 2.09                    | 2.09                   | 3.53                    | 3.83                   | 3.01                   | 5.19                    | 3.90            | 4.17         | 7.43                   | 7.43                   | 8.53                   | 8.71                   | 6.32        |
|           | DMSO        | 2.19                    | 2.09                   | 2.09                    | 2.09                   | 3.53                    | 3.83                   | 3.01                   | 5.18                    | 3.90            | 4.17         | 7.44                   | 7.44                   | 8.53                   | 8.71                   | 6.33        |
|           | 1,4-dioxane | 2.11                    | 2.01                   | 2.11                    | 2.01                   | 3.52                    | 3.82                   | 2.93                   | 5.31                    | 3.82            | 4.11         | 7.22                   | 7.39                   | 8.52                   | 8.70                   | 5.97        |
| <b>1b</b> | Gas         | 2.19                    | 2.10                   | 2.10                    | 2.10                   | 3.55                    | 3.84                   | 3.05                   | 5.16                    | -               | -            | 7.95                   | 7.95                   | 8.58                   | 8.67                   | 6.42        |
|           | Methanol    | 2.19                    | 2.10                   | 2.10                    | 2.10                   | 3.55                    | 3.84                   | 3.05                   | 5.16                    | -               | -            | 7.95                   | 7.95                   | 8.57                   | 8.67                   | 6.40        |
|           | DMSO        | 2.19                    | 2.10                   | 2.10                    | 2.10                   | 3.55                    | 3.84                   | 3.05                   | 5.16                    | -               | -            | 7.95                   | 7.95                   | 8.57                   | 8.67                   | 6.41        |
|           | 1,4-dioxane | 2.12                    | 2.00                   | 2.18                    | 2.05                   | 3.53                    | 3.84                   | 2.97                   | 5.29                    | -               | -            | 7.84                   | 7.84                   | 8.52                   | 8.66                   | 6.07        |

**Table S6b.** Scaled  $^1\text{H}$  NMR Chemical Shifts in compounds **1a** and **1b** in different solvents.

| Compound  | solvent     | CH <sub>2</sub><br>H16' | CH <sub>2</sub><br>H16 | CH <sub>2</sub><br>H17' | CH <sub>2</sub><br>H17 | CH <sub>2</sub><br>H15' | CH <sub>2</sub><br>H15 | OMe<br>H19,H19' | OMe<br>H19'' | CH <sub>Ar</sub><br>H6 | CH <sub>Ar</sub><br>H2 | CH <sub>Ar</sub><br>H3 | CH <sub>Ar</sub><br>H5 |
|-----------|-------------|-------------------------|------------------------|-------------------------|------------------------|-------------------------|------------------------|-----------------|--------------|------------------------|------------------------|------------------------|------------------------|
| <b>1a</b> | Methanol    | 2.16                    | 2.07                   | 2.07                    | 2.07                   | 3.37                    | 3.65                   | 3.71            | 3.96         | 6.92                   | 6.92                   | 7.92                   | 8.08                   |
|           | DMSO        | 2.10                    | 2.01                   | 2.01                    | 2.01                   | 3.33                    | 3.61                   | 3.67            | 3.92         | 6.93                   | 6.93                   | 7.93                   | 8.1                    |
|           | 1,4-dioxane | 2.12                    | 2.03                   | 2.12                    | 2.03                   | 3.41                    | 3.68                   | 3.68            | 3.95         | 6.79                   | 6.94                   | 7.98                   | 8.14                   |
| <b>1b</b> | Methanol    | 2.16                    | 2.08                   | 2.08                    | 2.08                   | 3.39                    | 3.66                   | -               | -            | 7.39                   | 7.39                   | 7.95                   | 8.04                   |
|           | DMSO        | 2.10                    | 2.02                   | 2.02                    | 2.02                   | 3.35                    | 3.62                   | -               | -            | 7.40                   | 7.40                   | 7.97                   | 8.06                   |
|           | 1,4-dioxane | 2.13                    | 2.02                   | 2.18                    | 2.06                   | 3.42                    | 3.70                   | -               | -            | 7.36                   | 7.36                   | 7.98                   | 8.11                   |



**Table S7a.** Calculated  $^{13}\text{C}$  NMR Chemical Shifts in compounds **1a** and **1b** in gas phase and in different solvents.

| Compound  | Solvent     | CH <sub>2</sub><br>C15 | CH <sub>2</sub><br>C18 | CH <sub>2</sub><br>C16 | CH <sub>2</sub><br>C17 | OMe<br>C19 | C <sub>Ar</sub><br>C1 | C <sub>Ar</sub><br>C2 | C <sub>Ar</sub><br>C6 | C <sub>Ar</sub><br>C3 | C <sub>Ar</sub><br>C5 | C <sub>Ar</sub><br>C4 | C <sub>Het</sub><br>C8 | C <sub>Het</sub><br>C9 | COOH<br>C11 |
|-----------|-------------|------------------------|------------------------|------------------------|------------------------|------------|-----------------------|-----------------------|-----------------------|-----------------------|-----------------------|-----------------------|------------------------|------------------------|-------------|
| <b>1a</b> | Gas         | 46.8                   | 46.5                   | 22.1                   | 24.5                   | 50.9       | 160.5                 | 116.9                 | 109.2                 | 119.2                 | 118.6                 | 132.5                 | 155.1                  | 121.9                  | 163.3       |
|           | Methanol    | 46.8                   | 46.5                   | 22.1                   | 24.5                   | 50.9       | 160.5                 | 116.9                 | 109.1                 | 119.3                 | 118.6                 | 132.5                 | 155.1                  | 121.9                  | 163.3       |
|           | DMSO        | 46.8                   | 46.5                   | 22.1                   | 24.5                   | 50.9       | 160.5                 | 116.9                 | 109.2                 | 119.2                 | 118.6                 | 132.5                 | 155.1                  | 121.9                  | 163.3       |
|           | 1,4-dioxane | 46.6                   | 46.4                   | 22.3                   | 24.6                   | 50.5       | 160.0                 | 116.8                 | 108.0                 | 119.6                 | 118.6                 | 133.0                 | 154.8                  | 122.0                  | 163.0       |
| <b>1b</b> | Gas         | 47.1                   | 46.5                   | 22.2                   | 24.5                   | -          | 155.0                 | 119.1                 | 118.4                 | 129.5                 | 123.4                 | 138.2                 | 139.8                  | 129.5                  | 163.2       |
|           | Methanol    | 47.0                   | 46.5                   | 22.2                   | 24.5                   | -          | 155.0                 | 119.0                 | 118.4                 | 129.6                 | 123.4                 | 138.2                 | 139.8                  | 129.5                  | 163.2       |
|           | DMSO        | 47.0                   | 46.5                   | 22.2                   | 24.5                   | -          | 155.0                 | 119.0                 | 118.4                 | 129.5                 | 123.4                 | 138.2                 | 139.8                  | 129.5                  | 163.2       |
|           | 1,4-dioxane | 46.8                   | 46.4                   | 22.4                   | 24.6                   | -          | 154.7                 | 118.9                 | 118.5                 | 128.9                 | 123.4                 | 138.2                 | 140.0                  | 129.1                  | 162.9       |

**Table S7b.** Scaled  $^{13}\text{C}$  NMR Chemical Shifts in compounds **1a** and **1b** in different solvents.

| Compound  | Solvent     | CH <sub>2</sub><br>C15 | CH <sub>2</sub><br>C18 | CH <sub>2</sub><br>C16 | CH <sub>2</sub><br>C17 | OMe<br>C19 | C <sub>Ar</sub><br>C1 | C <sub>Ar</sub><br>C2 | C <sub>Ar</sub><br>C6 | C <sub>Ar</sub><br>C3 | C <sub>Ar</sub><br>C5 | C <sub>Ar</sub><br>C4 | C <sub>Het</sub><br>C8 | C <sub>Het</sub><br>C9 | COOH<br>C11 |
|-----------|-------------|------------------------|------------------------|------------------------|------------------------|------------|-----------------------|-----------------------|-----------------------|-----------------------|-----------------------|-----------------------|------------------------|------------------------|-------------|
| <b>1a</b> | Methanol    | 50.76                  | 50.47                  | 26.62                  | 28.97                  | 54.77      | 161.87                | 119.26                | 111.64                | 121.61                | 120.92                | 134.51                | 156.59                 | 124.15                 | 164.60      |
|           | DMSO        | 49.63                  | 49.34                  | 25.60                  | 27.93                  | 53.62      | 160.23                | 117.82                | 110.33                | 120.06                | 119.47                | 133.00                | 154.98                 | 122.68                 | 162.96      |
|           | 1,4-dioxane | 50.30                  | 50.10                  | 26.63                  | 28.87                  | 54.09      | 160.75                | 118.67                | 110.10                | 121.40                | 120.42                | 134.45                | 155.68                 | 123.74                 | 163.67      |
| <b>1b</b> | Methanol    | 50.96                  | 50.47                  | 26.72                  | 28.97                  | -          | 141.64                | 131.58                | 131.67                | 120.73                | 121.31                | 140.08                | 156.49                 | 125.61                 | 164.51      |
|           | DMSO        | 49.82                  | 49.34                  | 25.70                  | 27.93                  | -          | 140.10                | 130.08                | 130.17                | 119.28                | 119.86                | 138.54                | 154.88                 | 124.14                 | 162.86      |
|           | 1,4-dioxane | 50.49                  | 50.10                  | 26.72                  | 28.87                  | -          | 141.27                | 130.65                | 130.46                | 120.33                | 120.72                | 139.51                | 155.58                 | 125.10                 | 163.57      |

**Table S8.** Calculated NBO charges in the hydrogen atoms of compound **1a** in gas phase and in different solvents.

| solvent     | CH <sub>2</sub><br>H16' | CH <sub>2</sub><br>H16 | CH <sub>2</sub><br>H17' | CH <sub>2</sub><br>H17 | CH <sub>2</sub><br>H15' | CH <sub>2</sub><br>H15 | CH <sub>2</sub><br>H18' | CH <sub>2</sub><br>H18 | OMe<br>H19,H19' | OMe<br>H19'' | CH <sub>Ar</sub><br>H6 | CH <sub>Ar</sub><br>H2 | CH <sub>Ar</sub><br>H3 | CH <sub>Ar</sub><br>H5 | COOH<br>H13 |
|-------------|-------------------------|------------------------|-------------------------|------------------------|-------------------------|------------------------|-------------------------|------------------------|-----------------|--------------|------------------------|------------------------|------------------------|------------------------|-------------|
| Methanol    | 0.219                   | 0.207                  | 0.205                   | 0.219                  | 0.201                   | 0.207                  | 0.236                   | 0.185                  | 0.182           | 0.201        | 0.235                  | 0.234                  | 0.245                  | 0.244                  | 0.506       |
| DMSO        | 0.219                   | 0.207                  | 0.205                   | 0.219                  | 0.201                   | 0.207                  | 0.236                   | 0.186                  | 0.183           | 0.201        | 0.235                  | 0.234                  | 0.245                  | 0.244                  | 0.506       |
| 1,4-dioxane | 0.215                   | 0.204                  | 0.205                   | 0.216                  | 0.200                   | 0.206                  | 0.241                   | 0.181                  | 0.178           | 0.198        | 0.227                  | 0.230                  | 0.243                  | 0.243                  | 0.497       |
| gas         | 0.219                   | 0.207                  | 0.205                   | 0.219                  | 0.201                   | 0.207                  | 0.235                   | 0.186                  | 0.183           | 0.201        | 0.236                  | 0.234                  | 0.245                  | 0.244                  | 0.507       |



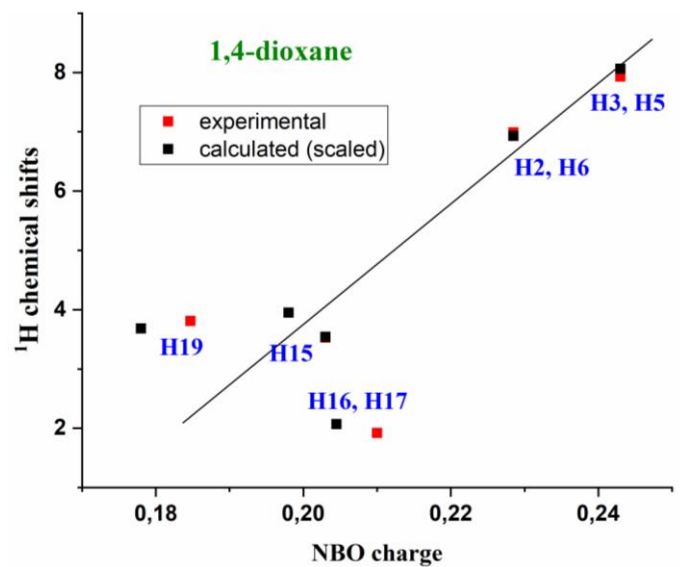

**Fig. S12.** Relationships between the theoretically scaled and experimental  $^1\text{H}$  chemical shifts in 1,4-dioxane versus the theoretical NBO atomic charges.



## 5. References

1. Gavlik, K. D.; Lesogorova, S. G.; Sukhorukova, E. S.; Subbotina, J. O.; Slepukhin, P. A.; Benassi, E. 2016, 2700-2710.
2. Safronov, N. E.; Fomin, T. O.; Minin, A. S.; Todorov, L.; Kostova, I.; Benassi, E.; Belskaya, N. P. Dyes and Pigm. 2020, 178, 108343.
3. Reijenga, J.; van Hoof, A.; van Loon, A.; Teunissen, B. Development of Methods for the Determination of pKa Values. Anal. Chem. Insights 2013, 8, 53–71.
